## **Sonogenetic control of mammalian cells using exogenous Transient Receptor Potential A1 channels**

Marc Duque<sup>1†</sup>, Corinne A. Lee-Kubli<sup>1†</sup>, Yusuf Tufail<sup>1†</sup>, Uri Magaram<sup>1,2</sup>, Janki Patel<sup>1</sup>, Ahana Chakraborty<sup>1</sup>, Jose Mendoza Lopez<sup>1</sup>, Eric Edsinger<sup>1</sup>, Aditya Vasani<sup>3</sup>, Rani Shiao<sup>1</sup>, Connor Weiss<sup>1</sup>, James Friend<sup>3</sup> and Sreekanth H.Chalasanani<sup>1,2\*</sup>.

<sup>1</sup> Molecular Neurobiology Laboratory, The Salk Institute for Biological Studies, La Jolla, CA 92037.

<sup>2</sup> Neurosciences Graduate Program, University of California San Diego, La Jolla, CA 92093

<sup>3</sup> Medically Advanced Devices Laboratory, Department of Mechanical and Aerospace Engineering, Jacobs School of Engineering and the Department of Surgery, School of Medicine, University of California San Diego, La Jolla, CA 92093.

**\*Corresponding author. Email: [schalanani@salk.edu](mailto:schalanani@salk.edu) (S.H.C)**

†These authors contributed equally to this work and are listed alphabetically.

### **Abstract**

**Ultrasound has been used to non-invasively manipulate neuronal functions in humans and other animals<sup>1-4</sup>. However, this approach is limited as it has been challenging to target specific cells within the brain or body<sup>5-8</sup>. Here, we identify human Transient Receptor Potential A1 (*hsTRPA1*) as a candidate that confers ultrasound sensitivity to mammalian cells. Ultrasound-evoked gating of *hsTRPA1* specifically requires its N-terminal tip region and cholesterol interactions; and target cells with an intact actin cytoskeleton, revealing**

**elements of the sonogenetic mechanism. Next, we use calcium imaging and electrophysiology to show that *hsTRPA1* potentiates ultrasound-evoked responses in primary neurons. Furthermore, unilateral expression of *hsTRPA1* in mouse layer V motor cortical neurons leads to *c-fos* expression and contralateral limb responses in response to ultrasound delivered through an intact skull. Collectively, we demonstrate that *hsTRPA1*-based sonogenetics can effectively manipulate neurons within the intact mammalian brain, a method that could be used across species.**

Ultrasound is safe, non-invasive, and can be easily focused through thin bone and tissue to volumes of a few cubic millimeters<sup>9,10</sup>. Moreover, continuous or repeated pulses of ultrasound at frequencies between 250 kHz – 3 MHz have been shown to stimulate neurons in rodents and non-human primates<sup>11-15</sup>. Ultrasound has also been used to safely manipulate deep nerve structures in human hands to relieve chronic pain<sup>16</sup>, as well as to elicit somatosensory<sup>17</sup> and visual cortex sensations<sup>18</sup> through the intact skull. These and other studies have revealed a wide interest in adapting ultrasound for both research and therapeutic purposes<sup>19</sup>. Nevertheless, the mechanisms that underlie ultrasound neurostimulation remain unclear, but may include mechanical forces<sup>20</sup>, heating<sup>16</sup>, cavitation<sup>19</sup>, and astrocyte signals<sup>21</sup> *in vitro*, or indirect auditory signals within the rodent brain *in vivo*<sup>22,23</sup>. We and others have found evidence for involvement of mechanosensitive channels in ultrasound responses of naïve rodent neurons *in vitro*<sup>24</sup> and *C. elegans* neurons *in vivo*<sup>25,26</sup>. This provides a potential path toward the development of a broadly usable sonogenetic tool that would target exogenous proteins to specific cells, thereby rendering them sensitive to ultrasound stimuli at pressures and durations that do not affect naïve cells.

We previously showed that exogenous expression of the *C. elegans* TRP-4 mechanoreceptor enables ultrasound sensitivity in neurons that are otherwise unresponsive to

ultrasound stimulation<sup>26</sup>. Similar ultrasound sensitivity has also been observed *in vitro* in cells induced to express proteins belonging to the mechanosensitive (MSC)<sup>27</sup>, Piezo<sup>28</sup>, Prestin<sup>29</sup>, transient receptor potential (TRP)<sup>24</sup>, and TREK<sup>30</sup> families. However, the frequencies at pressures used in most of these studies (500kHz-2MHz, 10MHz was used to show activation of TREK channels in *Xenopus* oocytes<sup>30</sup>) overlap with those reported to induce endogenous responses in neurons, have limited spatial resolution, or require bulky transducers, all of which restrict the ability to develop wearable devices. In addition, while lower frequency stimuli are more likely to penetrate biological tissue, they have large focal areas making it difficult to target specific brain regions (**Fig. 1a**). To overcome these challenges, we use ultrasound at 6.91 MHz, which can be focused to a small volume of 107  $\mu\text{m}^3$  with acceptable loss in energy. Moreover, this stimuli is unlikely to induce cavitation as its mechanical index range in our experiments (0.37 – 0.95) is below the threshold for cavitation onset of 1.9 in tissues<sup>31,32</sup>.

We therefore set out to find new proteins from these ion channel families and others thought to have mechanosensitive properties, which could confer ultrasound sensitivity to mammalian cells at higher frequencies (6.91MHz). To identify an optimal candidate, we used a functional readout-based assay to screen a library of 191 candidate channels and their homologs (**Extended Data Table S1**). We then used a combination of imaging, pharmacology, electrophysiology, and comparative sequence analysis, as well as behavioral, and histological analyses to demonstrate that a mammalian protein, *Homo sapiens* transient receptor potential A1 (*hsTRPA1*), confers ultrasound sensitivity to cells *in vitro* and *in vivo*, thereby establishing a new sonogenetic tool in mammals.

### ***hsTRPA1* is a sonogenetic candidate**

We first estimated the focal volume of ultrasound at different frequencies along with their penetration success in biological tissue using standard equations (see methods for details). These calculations show that while lower frequencies can penetrate 5 mm of brain tissue with minimal loss in energy, they tend to deliver energy to a large volume. Conversely, higher frequency ultrasound can be focused to a small volume, but is unable to penetrate brain tissue. We chose 6.91 MHz as an optimal frequency as it can be focused to  $107 \mu\text{m}^3$  with acceptable loss in energy (**Fig. 1a**). Next, we aligned an imaging setup with a custom-designed, single-crystal 6.91 MHz lithium niobate transducer (**Fig. 1b**) that does not exhibit hysteresis and thereby generates minimal heat as it converts electrical input into mechanical energy<sup>33</sup>. We also profiled the pressure output and corresponding temperature changes in our imaging set up using a combined fiber optic probe (**Extended Data Fig. 1a and 1b**) and selected ultrasound parameters for the screen at a pressure and duration that caused minimal temperature change (100 msec, 1.5 MPa). We also used a dye-labelling approach to test if these ultrasound stimulus parameters were affecting the integrity of cell membranes. We found that propidium iodide was unable to penetrate the cells exposed to these ultrasound stimuli, confirming that these parameters were not disrupting cellular membranes (**Extended Data Fig. 1-m**). We transiently transfected each of 191 candidate proteins (**Extended Data Table 1**) along with a dTomato (dTom) fluorescent reporter into human embryonic kidney-293T (HEK) cells expressing a genetically encoded calcium indicator (GCaMP6f<sup>34</sup>) and monitored changes in intracellular calcium upon ultrasound stimulation (**Extended Data Fig. 2a, b, d, e**). We found that cells expressing mammalian TRPA1 channels responded to ultrasound most frequently, with the human homolog as the most effective candidate (**Fig. 1c and Video S1**). Moreover, while we observe that most of the dTom+ cells do not respond to ultrasound stimuli, a significant fraction of the hsTRPA1-expressing cells

have robust responses (**Extended Data Fig. 2**). In contrast, the mouse homolog was only a third as responsive as *hsTRPA1*, and non-mammalian variants were insensitive to ultrasound (**Fig. 1d**), while still showing comparable responses to a chemical agonist, allyl isothiocyanate (AITC) (**Extended Data Fig. 2k**). None of the other proteins tested in our screen showed significant sensitivity to ultrasound parameters used in our screen, including channels previously shown to respond to ultrasound stimuli at different frequencies, pressures, or durations (**Fig. 1d**). While we confirmed functional overexpression of Piezo1 and TRPV1 candidate channels (**Extended Data Fig. 2h, i**), we cannot rule out the possibility that other tested proteins did not perform due to issues with expression, trafficking, or folding. Next, we compared the ultrasound responsiveness of *hsTRPA1* with that of previously identified sonogenetic candidates (MscL, Prestin, TRPV1 and Piezo1) at different frequencies. We found that *hsTRPA1* was more effective than these other candidates at frequencies of 1 MHz, 1.978 MHz, and 6.91 MHz, confirming that *hsTRPA1* channel was sensitive to a broad range of ultrasound stimuli (**Fig. 1f**).

We next confirmed that ultrasound responsiveness was due to direct activation of *hsTRPA1*. We first visualized *hsTRPA1* using immunohistochemistry and found that it was indeed expressed only in dTom<sup>+</sup> cells and trafficked to the HEK plasma membranes (**Fig. 2a**), where it co-localized with membrane-targeted EGFP-CAAX<sup>35</sup>. However, we do observe that only a small fraction of the *hsTRPA1* is detected on the membrane and cannot rule out a role for this protein in other cellular compartments. Also, we consistently found that HEK cells expressing *hsTRPA1* were selectively activated by ultrasound stimulation in a pressure- and duration-dependent manner (**Extended Data Fig. 2c**), while dTom-only control cells showed no response to ultrasound stimulation (**Extended Data Fig. 1g, h** and **Video S2**). Moreover, we found that the TRPA1-selective agonists N-methylmaleimide (NMM) and allyl isothiocyanate

(AITC)<sup>36</sup> also specifically activated TRPA1-expressing HEK cells, confirming that the channel was indeed functional (**Fig. 2b** and **Extended Data Fig. 2c, f, g**). Additionally, the TRPA1 antagonist HC-030331<sup>37</sup> inhibited ultrasound responses in *hsTRPA1*-expressing cells (**Fig. 2b**). Collectively, these results show that the ultrasound responses require gating of *hsTRPA1*, which facilitates intracellular calcium increases.

Next, we used electrophysiological methods to monitor changes in the membrane conductance of excitable HEK cells<sup>38</sup> expressing *hsTRPA1* or dTom-only control. To increase recording efficiency, we used a cell-attached configuration (**Fig. 2c**), wherein we were able to maintain suitable access and membrane resistance while exposing cells to ultrasound stimuli. We found that cells expressing *hsTRPA1* had higher basal rates of activity (**Fig. 2d**) but no significant disruptions in their I-V curve compared to controls (**Fig. 2e**), confirming that channel expression did not alter membrane properties. Furthermore, inward currents in response to ultrasound were significantly larger and more numerous in *hsTRPA1*-expressing cells compared to controls (**Fig. 2f-h**). These ultrasound-triggered currents were of similar magnitude as those previously observed for pharmacological activation of the TRPA1 channel<sup>39</sup>. Furthermore, we found that ultrasound-triggered membrane events were attenuated by the TRPA1 antagonist, HC-030301, confirming a specific role for *hsTRPA1* (**Fig. 2i**). Taken together, these results show that short ultrasound pulses can selectively lead to opening of *hsTRPA1* channels, resulting in a rapid increase of intracellular calcium in HEK cells.

### **Putative mechanisms underlying ultrasound sensitivity of TRPA1**

Multiple studies have shown that TRPA1 is a widely conserved calcium permeable non-selective cation channel that is involved in detecting a wide-range of exogenous stimuli

including electrophilic compounds that interact with the nucleophilic amino acids in the channel, small peptides that partition in the plasma membrane, cold, heat, and others, although sensitivity to different stimuli varies across species (reviewed by<sup>40</sup>). Despite this broad sensitivity and a resolved crystal structure, the underlying mechanisms of TRPA1 activation are only recently being elucidated. For example, a scorpion toxin peptide (WaTx) has been shown to activate TRPA1 by penetrating the lipid bilayer to access the same amino acids bound by electrophiles, thereby stabilizing the channel in an active state and prolonging channel opening<sup>41</sup>. In contrast, electrophilic irritants have been shown to activate the TRPA1 channel using a two-step cysteine modification that widens the selectivity filter to enhance calcium permeability and open the cytoplasmic gate<sup>42</sup>. These studies suggest that the TRPA1 channel might interact with the cytoskeleton and components of the membrane bilayers, including cholesterol, to transduce signals.

Structurally, TRPA1 comprises an intracellular N-terminal tip domain, 16 ankyrin repeats, 6 transmembrane domains and an intracellular C-terminal domain (**Extended Data Fig. 3a**). To identify TRPA1 domains critical for ultrasound sensitivity, we compared sequences of each domain in the human protein to its ultrasound-sensitive mammalian and ultrasound-insensitive non-mammalian chordate TRPA1 homologs (**Extended Data Fig. 3b** and **Table S2**). We expected that *hs*TRPA1 domains and motifs that are specifically conserved among mammals specifically may be crucial for ultrasound sensitivity. Sequence analysis of *hs*TRPA1 and the 9 additional homologs we tested revealed that the 61 amino acid N-terminal tip region is highly conserved in the mammalian compared to non-mammalian chordate species that we tested (58% vs 13% identity, respectively), particularly the first 22 amino acids (87% vs 17% identity, respectively, **Fig. 3a**). Therefore, we hypothesized that the N-terminal tip region might be

important for mediating ultrasound sensitivity. Indeed, deletion of the entire N-terminal tip region ( $\Delta 1-61$ ) and or the most highly conserved portion ( $\Delta 1-25$ ) from *hsTRPA1* completely abolished responses to ultrasound (**Fig. 3b**), while significantly increasing sensitivity to chemical agonist (**Fig. 3c**). In contrast to the N-terminal tip region, the ankyrin repeat regions are highly conserved across both tested mammals (82% identity) and non-mammalian species (54% identity), with the exception of ankyrin 1, which is least conserved across mammals (46% identity; **Table S2** and **Extended Data Fig. 3c**). Therefore, we hypothesized that ankyrin 1 would not be required for the ultrasound response. Indeed, deletion of only the first ankyrin repeat ( $\Delta ANK1$ ) had no effect on either sensitivity to ultrasound or the chemical agonist (**Fig. 3b, c**). In order, to further confirm the importance of the human N-terminal tip for mediating ultrasound sensitivity, we created chimeras consisting of the alligator or zebrafish N-terminal tip swapped into *hsTRPA1*. These chimeras completely lost the ability to respond to ultrasound (**Fig. 3d**). However, the alligator/*hsTRPA1* chimera had attenuated responses to AITC (**Fig. 3e**), suggesting that this channel may also have altered functionality. In contrast, the zebrafish/*hsTRPA1* chimera had normal responses to AITC (**Fig. 3e**). Nevertheless, immunohistochemistry showed comparable expression and trafficking of mutated channels, indicating their lack of ultrasound responses is not a consequence of poor expression (**Extended Data Fig. 4a**). Taken together, these data suggest that the human N-terminal tip region is important for *hsTRPA1* ultrasound sensitivity.

The N-terminal ankyrin repeats have also been hypothesized to interact with cytoskeletal elements and act as a gating spring in response to mechanical stimuli<sup>43,44</sup>. For example, ankyrin repeat regions from *Drosophila* NOMPC (TRPN) are thought to be important in mechanosensation due to their interactions with microtubules<sup>45</sup>. So, we probed the involvement



of cytoskeletal elements in ultrasound sensitivity of *hsTRPA1*. We found that treating *hsTRPA1*-expressing HEK cells with the actin depolymerizing agents, cytochalasin D and latrunculin A, reduced their ultrasound responses compared to vehicle or an actin stabilizing agent, jasplakinolide (**Fig. 3f**). In contrast, disrupting or stabilizing microtubules with nocodazole or Taxol, respectively, had no significant effect on ultrasound-evoked *hsTRPA1* responses (**Fig. 3f**). Immunohistochemistry confirmed that destabilizing treatments did indeed disrupt the actin cytoskeleton and microtubules (**Extended Data Fig. 5a,b**). Moreover, we found that AITC-triggered responses were not altered by treatment with either cytochalasin D or nocodazole, although they were significantly reduced by latrunculin A, jasplakinolide, and paclitaxel, confirming that these treatments did not completely disrupt TRPA1 function (**Extended Data Fig. 5c**). Therefore, actin depolymerization by cytochalasin D treatment selectively blocked *hsTRPA1* responses to ultrasound, but not chemical agonist, demonstrating a specific role for the actin cytoskeleton in ultrasound sensation.

Mouse TRPA1 has also been hypothesized to localize to lipid rafts through a mechanism governed by a cholesterol recognition/interaction amino acid consensus sequence (CRAC) domain within the transmembrane helix 2 (TM2) of TRPA1<sup>46</sup>. Interestingly, we identified a CRAC motif (L/V-(X)(1-5)-Y-(X)(1-5)-R/K, where X are non-polar residues) in transmembrane helix 2 that was highly similar in all mammalian homologs tested, but was absent in reptiles and heavily modified in fish (**Fig 3g**). Therefore, we hypothesized that interactions with cholesterol might be important for ultrasound responsiveness of *hsTRPA1* channels. We depleted cellular membrane cholesterol with methyl-beta-cyclodextrin (MCD)<sup>47</sup>, and found that this treatment attenuated *hsTRPA1* responses to ultrasound, but did not affect the response to AITC (**Fig. 3h**). In order to further explore the importance of the TM2 CRAC motif, we created a mutant channel

in which the required central tyrosine was replaced with a serine. This mutation caused a complete loss of ultrasound sensitivity without affecting responsiveness to AITC (**Fig. 3i-j**), confirming the critical of this TM2 CRAC motif. While the precise molecular mechanism of TRPA1 responsiveness to ultrasound remains elusive, our studies suggest a role for the N-terminal tip region, the actin cytoskeleton, and interaction with cholesterol in driving ultrasound-evoked *hsTRPA1* responses.

### ***hsTRPA1* potentiates ultrasound-responses in primary neurons**

To test whether *hsTRPA1* can also render neurons sensitive to ultrasound stimuli, we infected embryonic day 18 (E18) mouse primary cortical neurons with adeno-associated viral (AAV) vectors expressing either Cre-dependent *hsTRPA1* or Cre-only control along with GCaMP6f<sup>34</sup> (**Fig. 4a**). Consistent with previous studies<sup>48</sup>, we did not detect *hsTRPA1* RNA in dorsal root ganglia (DRG) or brains from E18 mice (**Extended Data Fig. 6e,f**). Next, we confirmed functional expression of *hsTRPA1* in infected neurons by monitoring their responses to AITC, and likewise observed that Cre-only control neurons did not respond to AITC (**Extended Data Fig. 7a**). Consistent with our HEK cell results, we found that ultrasound triggered a significant increase in intracellular calcium in *hsTRPA1*-expressing neurons (**Fig. 4b, c** and **Video S3**). Cre-expressing neurons showed some calcium responses to ultrasound, but these were significantly lower in magnitude than those observed in *hsTRPA1*-expressing neurons (**Extended Data Fig. 7b,c**, **Video S4** and **Extended Data Fig. 8a-c**). Both *hsTRPA1* and control Cre-expressing neurons showed increased responses to longer (**Extended Data Fig. 7d**) and more intense ultrasound stimuli (**Fig. 4d**). These results are consistent with previous studies showing that ultrasound-exposure does result in a small change in intracellular calcium in naïve

neurons<sup>24</sup>. However, *hsTRPA1*-expressing neurons showed greater sensitivity and reduced response latency to ultrasound stimuli (**Extended Data Fig. 8d, e**). The majority of *hsTRPA1*-expressing neurons had a response latency within 500-900ms of stimulus onset, while response durations ranged from 2-30 s (**Extended Data Fig. 8f, g**). Moreover, *hsTRPA1*-expressing neurons could be repeatedly stimulated without apparent deleterious effects on cell health or a substantial decrement in calcium flux (**Fig. 3e** and **Video S5**), with cells returning to baseline after stimulation.

Next, we probed whether ultrasound-mediated effects in control and *hsTRPA1*-expressing neurons were due to TRPA1. Treating *hsTRPA1* expressing neurons with HC-030331 significantly attenuated their responses to ultrasound but had no effect on the ultrasound-evoked activity in control neurons (**Extended Data Fig. 7e**). Furthermore, cortical neurons cultured from TRPA1<sup>-/-</sup> mice also responded to ultrasound (**Extended Data Fig. 7f**), indicating that even undetectable levels of TRPA1 in neurons or astrocytes likely do not account for ultrasound responses in control neurons. Moreover, the sodium channel blocker, tetrodotoxin, partially blocked ultrasound responses in *hsTRPA1* neurons, while completely abolishing responses in control neurons (**Extended Data Fig. 7e**). We also found that sequestering extracellular calcium with BAPTA blocked neuronal responses to ultrasound (**Extended Data Fig. 8h**). However, treating neurons with a TRPV1 antagonist had no effect on their ultrasound responses (**Extended Data Fig. 8h**), thereby ruling out the TRPV1 heat-responsive channel's contribution to ultrasound sensitivity in TRPA1-expressing neurons either directly or through a synergistic interaction<sup>49</sup>. These results are consistent with a recent study that identified multiple mechanosensitive channels that can transduce calcium responses to ultrasound in control neurons<sup>24</sup>. These results show that ultrasound can directly activate AAV9-*hsTRPA1* transduced

neurons, leading to intracellular calcium influx, which may be amplified by voltage-gated sodium channels. In contrast, ultrasound responses in control neurons are due to a TRPA1-independent mechanism.

We next used electrophysiological methods to confirm the role of *hsTRPA1* in mediating ultrasound-evoked neuronal responses. We were able to obtain stable membrane resistances and reliable measurements during ultrasound stimulation trials using a whole-cell patch clamp configuration (**Fig. 4f**). However, we were only able to assay responsiveness to pressures below 0.5 MPa in order to ensure integrity of the patch. Similar to our HEK cell experiments, we found that AAV-mediated *hsTRPA1* expression did not alter neuronal membrane properties (**Extended Data Fig. 9a**). In voltage clamp, Cre-expressing control neurons showed inward currents in response to ultrasound, consistent with previous studies<sup>12,24</sup>. However, *hsTRPA1*-expressing neurons showed larger current responses (>400 pA) compared to controls within a few milliseconds of ultrasound stimulation (**Fig. 4g-i**). Taken together, *hsTRPA1*-expressing neurons had enhanced responses to ultrasound relative to control as assessed by their relative response, magnitude of peak responses and area under the curve metrics (**Extended Data Fig. 9b-f**). We further evaluated responsiveness to ultrasound in current clamp mode to evaluate action potential generation. Ultrasound stimulation triggered action potentials in neurons expressing *hsTRPA1* (**Fig. 4j**) at pressures as low as 0.2MPa, whereas control neurons showed subthreshold changes in membrane voltage that were insufficient to trigger action potentials during a majority of stimulation trials (**Fig. 4k**). Collectively, all assayed *hsTRPA1*-expressing neurons showed ultrasound-evoked action potentials, though not every ultrasound stimulus triggered an action potential, whereas control neurons had infrequent action potentials in response to ultrasound (**Fig. 4l**). Neither the latency, peak voltage or time to peak of action potentials in response to

ultrasound were altered by expression of TRPA1 (**Extended Data Fig. 9g-i**), and the membrane resting potential was similar between the two groups (**Fig. 4m**). These data demonstrate that ultrasound triggers increased currents and action potentials in *hsTRPA1*-expressing neurons even at ultrasound pressures well below those shown to elicit responses by calcium imaging.

### ***hsTRPA1 confers ultrasound sensitivity in vivo***

We next determined whether *hsTRPA1* can be used as a sonogenetic tool for temporally selective activation of neurons *in vivo*. To this end, we used Cre-dependent AAV to restrict the expression of *hsTRPA1* to layer V motor cortical neurons in *Npr3:Cre* transgenic mice<sup>50</sup> (**Fig. 5a**). We first used *in situ* hybridization to confirm that adult cortical neurons do not express endogenous TRPA1 (**Extended Data Fig.6**). Consistently, data from the Allen Brain Atlas, Biogps and Brain-seq projects confirm that TRPA1 expression is undetectable in the brain<sup>51-53</sup>. Using coordinates based on a previous study<sup>54</sup>, we co-injected AAV9 encoding myc-tagged *hsTRPA1* with AAV9 encoding GFP to visualize the transfected neurons, into the left motor cortex. This approach robustly transduced layer V cortical neurons throughout the forelimb and hindlimb motor cortices (**Fig. 5b** and **Extended Data Fig. 10a**) and their projections in the right cervical and lumbar spinal cord (**Extended Data Fig. 10b**)<sup>55</sup>. Using the 6.91 MHz lithium niobate transducer coupled to the exposed skull through ultrasound gel, we verified our ability to deliver ultrasound to cortical regions. This *in vivo* approach delivered peak negative pressures ranging from 0.35-1.05 MPa with minimal temperature changes to cortex and other brain regions (**Extended Data Fig. 11**). These data suggest that we are also able to non-invasively target deeper brain regions with our ultrasound delivery system non-invasively.

After 2-4 weeks following intracranial injection, we monitored ultrasound-evoked electromyography (EMG) responses in the bilateral biceps brachii and biceps femorii muscles. Ultrasound evoked few EMG responses and no visible movements in any of the limbs of GFP-control mice (**Fig. 5d-f**). In contrast, animals injected with AAV9-*hsTRPA1* in the left motor cortex showed dose-dependent EMG responses and visible movement in their right fore- and/or hindlimbs (**Fig. 5d, e** and **Video S6**). EMG responses in the left forelimb occurred infrequently, suggesting circuit specific sensitivity to ultrasound (**Fig. 5f**). Consistently, we also observed some of the transduced cortical neuron processes innervating the left forelimb motor pools (**Extended Data Fig. 10d**). Moreover, while most EMG responses occurred within one second of ultrasound stimulation, the latency and duration of these responses increased with stimulus duration (**Fig. 5g, h**). To confirm functional activation of cortical neurons, we then tested whether ultrasound stimulation increased *c-fos* in motor cortical neurons expressing *hsTRPA1*. While ultrasound stimulation had no effect on the number of *c-fos* positive cells in animals expressing GFP, it significantly increased the number of *c-fos* positive cells in cortical motor neurons of *hsTRPA1*-expressing mice (**Fig. 6a-c** and **Extended Data Fig. 12b**). This upregulation was specific to the cortex and we did not detect increased *c-fos* in the auditory cortex in these animals (**Extended Data Fig. 12c-f**), suggesting that the ultrasound-mediated effect does not involve incidental activation of the auditory cortex as has been previously suggested<sup>22,23</sup>.

We could reliably activate both *in vitro* and *in vivo* neural circuits using sonogenetics. To assess its safety *in vivo*, we studied two metrics of safety, the effect of cortical TRPA1 expression on a motor learning task and the effect of sustained ultrasound delivery on integrity of the blood-brain barrier. We found that both *hsTRPA1*- and GFP-expressing animals had

comparable ability to learn the rotarod task (**Extended Data Fig. 12a**). Similarly, we found that animals receiving one hour of intermittent ultrasound stimulation had no damage to their blood brain barrier. In contrast to stab wound positive control animals in which both 10kDa fluorescent dextran accumulated and mouse IgG showed elevated binding, no increase in fluorescence was observed in animals receiving ultrasound, indicating that neither large nor small proteins were able to leak through the blood brain barrier during sonication (**Extended Data Fig. 13**). Taken together, these results show that ultrasound can be used to selectively modulate neurons infected with AAV9-*hsTRPA1* through an intact mouse skull at a frequency and pressure that neither affects normal behavior nor causes blood-brain barrier impairment.

## DISCUSSION

We demonstrate that *hsTRPA1* is a candidate sonogenetic protein that confers ultrasound sensitivity to mammalian HEK cells and rodent neurons *in vitro* and *in vivo* (**Fig. 6d**). Using an unbiased screen, we found that *hsTRPA1*-expressing HEK cells show ultrasound-evoked calcium influx and membrane currents. Moreover, we reveal critical components of *hsTRPA1* ultrasound sensitivity, including the N-terminal tip region and interactions with the actin cytoskeleton and cholesterol. We also show that *hsTRPA1* potentiated ultrasound-evoked calcium transients and enabled ultrasound-evoked action potentials in rodent primary neurons, this is the first report of ultrasound-induced action potentials using patch clamp at clinically relevant frequencies, lower than 25MHz. In addition, we used *hsTRPA1* to selectively activate neurons within an intact mouse skull, using single pulses of ultrasound ranging from 1-100 msec. These ultrasound parameters are below the range associated with cavitation<sup>56</sup>. Accordingly, we observed no damage to the blood brain barrier even with intermittent ultrasound

delivered over 60 minutes. Moreover, overexpressing *hsTRPA1* did not cause behavioral changes on rotarod assays, confirming the viability of this candidate protein for sonogenetics use in rodent experiments. Our results are in contrast to a previous study showing that mouse TRPA1 functions in astrocytes and use a Best1 dependent pathway to release glutamate depolarizing neighboring neurons upon ultrasound<sup>21</sup>. That model requires TRPA1 and Best1 expression in astrocytes, which is highly controversial<sup>57-59</sup>. Additionally, we and others confirm that TRPA1 is undetectable in the brain<sup>51-53</sup> and that ultrasound can non-invasively activate neurons expressing exogenous *hsTRPA1* *in vitro* and *in vivo*, indicating the viability of our method.

Ultrasound has been shown to have neuromodulatory effects in mice<sup>12,13</sup>, non-human primates<sup>14,15</sup>, and even human subjects<sup>17,18</sup>, though the underlying mechanisms remain poorly understood. We previously showed that overexpressing the mechanosensory receptor TRP-4 (a TRP-N homolog) in *C. elegans* neurons renders them sensitive to short pulses of ultrasound, identifying the first putative sonogenetic candidate<sup>26</sup>. Multiple groups have since identified additional ultrasound-sensitive candidates including MscL<sup>27</sup>, Prestin<sup>29</sup>, Piezo<sup>28</sup>, TREK<sup>30</sup>, MEC-4<sup>25</sup>, TRPC1, TRPP2, and TRPM4<sup>24</sup> using *in vitro* assays. Of these, a mutated form of MscL has demonstrated activity *in vivo*<sup>60</sup>, but there is nevertheless value and a need to identify novel sonogenetic candidates to extend the toolset and potentially develop channels that respond to different ranges of frequency and pressure. We identified *hsTRPA1* and its mammalian homologs as top hits for high frequency sonogenetic candidates in an unbiased screen from a curated library of candidate proteins, emphasizing the unique nature of this protein. In addition, we find that *hsTRPA1* outperforms previously identified sonogenetic candidates across different ultrasound frequencies.



Previous studies have shown that ankyrin repeats form a super helical coil that could act as springs for mechanosensitive gating in NOMPC/TRPN1<sup>44</sup>. We show that the TRPA1 N-terminal tip domain, particularly the first 25 amino acids, might be critical for ultrasound sensitivity and is highly similar in mammalian TRPA1 variants that showed sensitivity to ultrasound, but varies across non-mammalian chordate TRPA1 homologs that did not. Furthermore, a chimera composed of the *am*TRPA1 N-terminal tip on *hs*TRPA1 also lacks responses to ultrasound, providing stronger evidence that this region is important for tuning ultrasound sensitivity in mammalian TRPA1 variants. Indeed, previous work has suggested that variations in the N-terminal tip of TRPA1 affect its temperature sensitivity, suggesting that this region of TRPA1 can regulate channel function<sup>61</sup>. We further show that an intact actin cytoskeleton is required for *hs*TRPA1 ultrasound responses. Consistently, previous studies have shown that the actin cytoskeleton can either directly interact with mechanosensitive channels<sup>62</sup> or interact with the plasma membrane to modify mechanosensation<sup>63</sup>. We therefore speculate that the *hs*TRPA1 N-terminal tip region may interact with the actin cytoskeleton to transduce ultrasound-induced membrane perturbations into changes in intracellular calcium. Our analysis of TRPA1 sequences across homologs further suggests that a CRAC domain that is thought to mediate interactions with cholesterol<sup>46</sup> is heavily modified or missing from the second transmembrane domain of ultrasound-insensitive variants. Indeed, we found that interaction with the lipid bilayer is critical for ultrasound sensitivity of *hs*TRPA1 as treating *hs*TRPA1-expressing cells with MCD, which removes cholesterol, attenuated their responses to ultrasound but not to a chemical agonist. Furthermore, mutation of the central tyrosine that is critical for cholesterol interaction of the CRAC domain likewise impaired ultrasound-sensitivity, but not responses to

AITC. These data are consistent with previous studies showing that TRPA1 activation requires membrane lipid interactions<sup>64</sup>

Previous studies have shown that naïve neurons can respond to ultrasound both *in vitro*<sup>24</sup> and *in vivo*<sup>12</sup>. Similarly, we observe that the ultrasound parameters we use can also trigger increased currents and intracellular calcium in naïve neurons *in vitro*. However, these responses are significantly smaller than those observed in *hsTRPA1*-expressing neurons, and ultrasound-evoked action potentials were rarely detected at the frequency and pressures tested. Additionally, responses in control neurons *in vitro* could be likely an artefact of the 2-dimensional cultures, interactions with the substrate, or interactions with the patch pipette in electrophysiology<sup>65</sup>. Further experiments using more physiologically relevant systems, such as brain slices and 3-dimensional neuronal cultures will be needed to explore the extend of the endogenous neuronal response to ultrasound at 6.91MHz. Moreover, we find that ultrasound responses in control neurons are unlikely to be TRPA1-mediated, as these are not reduced upon treatment with TRPA1 antagonists, and because neurons cultured from TRPA1<sup>-/-</sup> mice also responded to ultrasound. Accordingly, we did not detect endogenous TRPA1 in E18 brain tissue. Together, these results suggest that intrinsic neuronal responses to our ultrasound parameters are unlikely to involve TRPA1 in neurons. Instead, a recent study found that knocking down TRPP1, TRPP2, Piezo, TRPC1, and TRPM4 each partially reduce ultrasound-evoked neuronal responses<sup>24</sup>. We also show that blocking voltage-gated sodium channels eliminated neuronal ultrasound-evoked calcium responses. Therefore, intrinsic ultrasound neuromodulation may involve a number of ion channels whose activity is further amplified by voltage-gated sodium channels. We show that *hsTRPA1*-expressing neurons maintain partial ultrasound sensitivity in the presence of a sodium-

channel blocker, confirming that *hsTRPA1*-mediated ultrasound sensitivity is at least partially independent from the mechanism contributing to ultrasound activation in control neurons.

Finally, we demonstrate that *hsTRPA1* can be used to selectively activate a specific cell population *in vivo* with ultrasound pulses (1-100 msec) from a 6.91 MHz transducer. Our data hint that ultrasound might not act as a simple stretch force on the membrane, and that channels that likewise sense other perturbations, including lipid bilayer changes, could be good candidates for sonogenetics. Moreover, our identification of specific interactions (namely, actin, and membrane cholesterol) and the N-terminal tip domain in *hsTRPA1* will allow us to rapidly engineer this channel for enhanced ultrasound sensitivity and ion permeability. Broadly speaking, we suggest that *hsTRPA1* and its variants could be used to non-invasively control neurons and other cell types across species.

## **AUTHOR CONTRIBUTIONS**

M.D., C.L-K., designed and performed experiments, analyzed data and wrote the paper; Y.T., U.G.M., A.C., J.P., J.M.L., designed and performed experiments and analyzed data; E.E. performed bioinformatic analysis; R.S. designed the membrane localization study and established the histology workflow; C.W. performed BaseScope analysis; A.V., J.F. designed, fabricated and validated ultrasound transducers; and S.H.C. designed experiments and wrote the paper.

## **ACKNOWLEDGEMENTS**

We thank Vivian Ko, Daniel Gibbs, Teresa Grider, Josh Nichols, Edward Callaway, Richard Daneman, Ken Diffenderfer and Mike Rieger for their technical help; Edward Callaway, Marcos Sotomayor, Kathleen Quach, Javier How, and members of the Chalasani lab for their critical

reading of the manuscript. This work was funded by grants from the National Institutes of Health (R01MH111534, R01NS115591), Brain Research Foundation, Innovation grants from Salk Institute and Kavli Institute of Brain and Mind (S.H.C.). C.L-K. is a Vertex Fellow of the Life Sciences Research Foundation. J.F. is grateful for funding from the W.M. Keck Foundation (SERF) in support of transducer design and fabrication for this work. This work was also supported by the Waitt Advanced Biophotonics and GT3 Cores with funding from NCI CCSG P30014195 and NINDSR24, respectively.

#### **DECLARATION OF INTERESTS**

The authors declare no competing interests.

#### **METHODS**

##### Animal husbandry

Studies were performed using a total of 50 adult mice including both males and females. Animals were group housed in an American Association for the Accreditation of Laboratory Animal Care approved vivarium on a 12-hour light/dark cycle, and all protocols were approved by the Institutional Animal Care and Use Committee of the Salk Institute for Biological Studies. Food and water were provided ad libitum, and nesting material was provided as enrichment. Colonies of C57Bl6/J (JAX# 000664), Npr3-cre<sup>50</sup> (JAX# 031333), TRPA1 knockout<sup>66</sup> (JAX #006401) mice were maintained for experiments.

##### BaseScope

Adult TRPA1 knockout<sup>66</sup> (JAX #006401) and wild-type C57Bl6/J (JAX #000664) mice were perfused with 0.9% saline. A WT C57/Bl6 E18 mouse embryo was also collected from a cohort of embryos slated for dissociation for use in in vitro experiments. Brains and lumbar DRG were extracted and immediately frozen in OCT. Fresh frozen sections (10um) were direct mounted and slides were stored at -80°C overnight. A custom BaseScope probe (BA-Mm-Trpa1-3zz-st, ACD-Bio Probe Design #: NPR-0003309) targeting 2602-2738 of mouse TRPA1

(NM\_177781.5. GTGATTTTT AAAACATTGC TGAGATCGAC CGGAGTGTTT  
ATCTTCCTCC TACTGGCTTT TGGCCTCAGC TTTTATGTTC TCCTGAATTT  
CCAAGATGCC TTCAGCACCC CATTGCTTTC CTTAATCCAG ACATTCAG). This region  
was chosen because it is deleted in the TRPA1 knockout mouse. Tissues were also probed with  
positive (Ppib, ACD #701071) and negative control (DapB, ACD#701011) probes, which gave  
the expected results in all experiments. DRG tissue was used as positive control for the TRPA1  
probe, as small-diameter DRG neurons are known to express TRPA1. DRGs and cortices from  
TRPA1 knockout mice were used as a negative control for the TRPA1 probe.

### Blood brain barrier experiments

Mice received retro-orbital injections of 10kDa fluorescein isothiocyanate-dextran (Sigma FD10S) at 150mg/mL in saline. Positive control mice immediately received a cortical stab wound with a 27g needle through a small hole drilled at AP 0, ML -1, DV -0.5. Ultrasound-treated mice had their scalp opened and the ultrasound transducer was coupled over the left cortex with ultrasound gel. The transducer delivered 100ms stimuli at 0.88 MPa every 10 seconds for 1 hr. Sham-treated mice underwent the same procedure but the transducer was not turned on. A cohort of mice that did not receive dextran injection or ultrasound was also collected for as a negative control, and all value were normalized to this cohort. (n=4-5 per group, evenly split between male and female). Mice were perfused 70 minutes after cortical injection or start of the ultrasound treatment. One ultrasound-treated mouse had to be omitted from the data set due to inadequate perfusion. Brain sections were sectioned at 35  $\mu$ M and processed as floating sections. After blocking, sections were incubated with 647 donkey anti-mouse and DAPI. Images were collected on an Olympus Virtual Slide Scanner (VS-120), using the same settings across all groups. Fluorescein isothiocyanate-dextran 488 and 647-mouse IgG were quantified as mean intensity in left and right cortex from each sample using FIJI. All values were normalized to fluorescent values obtained from samples that received neither dextran nor ultrasound.

### Calcium imaging analysis

All image analysis was performed using custom scripts written as ImageJ Macros. Cells in the dTom channel were segmented and cell fluorescence over time in the GCaMP channel was

measured and stored in csv files. Briefly, the script uses a gaussian filter on the dTomato channel and background subtraction, followed by auto thresholding and watershed segmentation. The plugin ‘Analyze particles’ was then use to extract counts. Calcium data was analyzed using custom Python scripts. Calcium signal was normalized as  $\Delta F/F$  using a 6s baseline for each ROI and a peak detection algorithm with a fixed threshold of 0.25 was used to identify responsive cells after ultrasound stimulation, similar to the approached used by <sup>21</sup>. For the screen, the number of cells showing a response to ultrasound was calculated as the total percent of responsive cells after 3 consecutive 90 second recordings on the same coverslip. Percent of transfected cells was calculated as the number of dTom positive cells/total number of cells per field of view imaged. To compare ultrasound response between clones, we used a generalized mixed model, fitting “response” as a Bernoulli response, “clone” as a fixed factor and “cell” as a random effect. Pairwise comparisons were later performed using odds ratios and Tukey method, correcting for multiple comparisons.

Peak amplitude was calculated for each trace as the maximum GCaMP6f  $\Delta F/F$  value during 60 s after ultrasound stimulation or pharmacological treatment for HEK cells, and 5 s for mouse primary neurons. For the AITC response curve in neurons, mean GCaMP6f  $\Delta F/F$  up to 1.5 min after adding AITC to the media was used instead of peak amplitude response. For latency and duration analysis in primary neurons, latency of calcium responses was measured as the time to reach 63% of the peak amplitude after stimulation, while width was calculated as the distance between 63% rise and 63% decay.

### Candidate channel screen

We generated a library of candidate channels that was initially based on a literature survey of naturally occurring ion channels and other membrane proteins that have been suggested to display mechanosensitive or ultrasound sensitive properties<sup>26-29,70,71</sup>. From this initial list, related channels and variants from different species were selected, resulting in a final set of 191 proteins (Supplementary Table S1). Each channel was cloned into a custom bicistronic pcDNA3.1(+) vector using a porcine teschovirus-1 2A self-cleaving peptide (p2A) sequence, expressing the channel and the fluorescent protein dTomato under a human cytomegalovirus (CMV) promoter. All plasmids were generated by Genscript Biotech (New Jersey, United States).

### Consensus sequence and percent identity

Consensus sequences for the 10 tested chordate, mammalian, and non-mammalian alignments, each having *hsTRPA1* as reference, were generated in Geneious Prime. Threshold for consensus was set to 65%, as this ensured contribution from both mammalian and non-mammalian sequences for chordate, from rodents, ungulates, and bats for mammalian, and from reptiles and fishes for non-mammalian alignments. Alignment and consensus sequences were annotated in Geneious Prime to highlight either agreement or disagreement of a given amino acid relative to human TRPA1. Percent identity of consensus sequence to human was calculated to quantify the degree of sequence conservation or divergence in the chordate, mammalian, non-mammalian species.

### Constructs of ankyrin TRPA1 mutants

To generate mutant constructs, a PCR based approach was used. Bicistronic constructs co-expressing deletion mutants and dTom were synthesized by Genscript Biotech (New Jersey, United States). For  $\Delta$ ANK1, amino acids (aa) 67-95 (Ref seq. UniProtKB - O75762) were deleted, corresponding to nucleotide deletions 2641-2727 (Ref seq. XM\_017013946.1). For the rest of constructs the aa and nucleotide deletions were as follows:  $\Delta$ N-tip: aa deletions 1-61, nucleotide deletions 1-182 ;  $\Delta$ N-tip (1-25), aa deletions 1-25, nucleotide deletions 1-75; CRAC mutant, swapping Tyr (Y)785 to Ser (S), nucleotides 2353-2355 (TAC) to TCG; *alligator* N-tip, swapping aa 1-66 from *hsTRPA1* to first 66 residues from *amTRPA1*; *zebrafish* N-tip, swapping aa 1-59 from *hsTRPA1* to first 59 residues from *drTRPA1*.

### CRAC-CARC motif annotation

CRAC ([LV]X(1,5)YX(1,5)[RK]) and CARC ([RK]X(1,5)[YF]X(1,5)[LV]) motifs, as defined in<sup>79</sup> were annotated per TRPA1 sequence using the Geneious Prime EMBOSS 6.5.7 fuzzpro tool<sup>80</sup>.

### EMG experiments

EMG experiments were conducted between 2-4 weeks after viral injection. EMG data were collected under ketamine (100mg/kg) and xylazine (10mg/kg) anesthesia from the right and left biceps brachii and right and left biceps femoris through fine wire electrodes (A-M Systems

790700) connected to a PowerLab and BioAmp (AD Instruments). Data were collected at 40k/sec, bandpass filtered from 300 Hz to 1 kHz. Correct electrode placement was confirmed by positive EMG signal in response to pinch. The skin over the skull was opened, and the 6.91MHz lithium niobate ultrasound transducer was coupled to the skull using ultrasound gel (Parker Aquasonic 100). Ultrasound stimuli (1, 10, 100 msec durations) were administered at no less than 10 second intervals at intensities ranging from 0.35-1.05 MPa, intracortical pressure. Visual movement of the right fore or hindlimb in response to stimulation was noted and EMG responses were analyzed for latency and duration. Due to the relatively large stimulus artefact from the ultrasound pulse, responses occurring during the ultrasound stimulus could not be reliably quantified. Therefore, only responses occurring after cessation of the stimulus were considered in our analyses. The experimenter was blinded as to the group during both collection and analysis of the data.

#### Ultrasound focal area and attenuation calculations

The focal area was calculated based on determining the wavelength ( $\lambda$ ) of ultrasound for various frequencies (f) using the equation  $\lambda = c/f$  (where c is the approximate speed of sound in brain tissue,<sup>71</sup> 1500 m/s). The focal area is diffraction limited at approximately  $\lambda/2$ . Brain tissue attenuates ultrasound at a much greater rate than water<sup>71</sup>. We estimated attenuation with the following equation: Attenuation = 0.8 dB/(cm x ultrasound frequency). The attenuation of the ultrasound signal at 5 mm depth in brain tissue is shown in **Fig. 1a**)

#### HEK cell culture and transfection

HEK cells expressing human  $\alpha v\beta 3$  integrin<sup>67</sup> were cultured in DMEM supplemented with 10% FBS and 20mM glutamine in a 5% CO<sub>2</sub> incubator. A stable calcium reporter line was generated with a GCaMP6f lentivirus (Cellomics Technology PLV-10181-50) followed by FACS sorting. For screening experiments and characterization of each candidate channel, GCaMP6f-expressing HEK cells were seeded on 12-well cell culture plates with 18mm glass coverslips coated with PDL (10 $\mu$ g/ $\mu$ l; Sigma-Aldrich P6407) for 1-2h. Coverslips were washed with Milli-Q water and cells seeded at a density of 250000 cells/well. Cells were transfected with Lipofectamine LTX Reagent (ThermoFisher 15338100) according to the manufacturer's protocol and 24h after



plating, using 500ng DNA of the clone of interest for each well. Cells were kept at 37°C for an additional 24 hours before imaging on our ultrasound stimulation setup.

#### Imaging rig for ultrasound stimulation

We upgraded an existing upright epi-fluorescent Zeiss microscope to perform a monolayer two-dimensional screen. For this application we used our custom-made 12x12mm lithium niobate transducer placed in a heated stage fixture underneath the cell chamber. Stimulus frequency and duration were controlled by a waveform generator (Keysight 33600A Series), and pressure was controlled through a 300-W amplifier (VTC2057574, Vox Technologies, Richardson, TX). Simultaneous calcium imaging was performed using a 40x water dipping objective at 16.6 frames per second with an Orca Flash 4.0 camera and a GFP filter.

#### Immunocytochemistry

Cells were fixed with 4% paraformaldehyde (PFA) at room temperature for 15 min and subsequently permeabilized by 0.25% Triton X-100 PBS with 5% horse serum. After incubation in blocking solution for 1h at room temperature, cells were incubated overnight at 4°C with different primary antibodies: for HEK cells a mouse monoclonal  $\alpha$ TRPA1 antibody (1:1000; Santa Cruz Biotech #376495) was used, while a rabbit polyclonal anti-myc antibody (1:1000; Cell Signaling Tech #2272S) was used to detect the tagged channel in primary neuron cultures. Secondary antibody staining was performed at room temperature for 2 h, followed by DAPI for 30min. For myc, TSA amplification was performed to increase the signal<sup>81</sup>. Co-localization to the cell membrane was determined via co-transfection and co-immunolabeling with EGFP-CAAX<sup>82</sup>, which was a gift from Lei Lu (Addgene plasmid #86056; <http://n2t.net/addgene:86056>; RRID:Addgene\_86056). For cytoskeleton immunolabeling experiments, fixed cells were incubated with alpha-tubulin antibody (Sigma, #CBL270-I, 1:1000) or phalloidin-488 (ThermoFisher, #A12379, 1:500).

#### Immunohistochemistry and *c-fos* quantification

At the conclusion of the study, mice were perfused with 0.9% saline followed by 4% paraformaldehyde (PFA) through a peristaltic pump. Brain tissue was immediately collected and incubated in 4% PFA overnight before being changed to 30% sucrose. Tissue was then

sectioned at 35  $\mu\text{M}$  into tissue collection solution (glycerine, ethylene glycol,  $\text{NaH}_2\text{PO}_4$ ,  $\text{Na}_2\text{HPO}_4$ ) and stored at 4°C. For brain immunohistochemistry, brain sections from ~every 350  $\mu\text{M}$  were immunolabeled for myc (1:500; Cell Signaling 2272S), c-fos (1:500; Encor RCPA-cfos), NeuN (1:1500; Synaptic Systems 226004), GFP (1:1000; AVES GFP-1010) and DAPI (1:1000). Tyramide amplification was used to enhance the myc and c-fos signals. Briefly, tissue was incubated for 30 min in  $\text{H}_2\text{O}_2$ , blocked for 1 hr in PBST plus 5% horse serum, and then incubated overnight with primary antibodies. The next day, tissue was incubated for 3 hrs at room temp with biotinylated donkey anti-rabbit (1:500, Jackson ImmunoResearch 711-065-152), then washed, incubated with ABC (Vector Labs PK-4000) for 30 min, washed, incubated with tyramide<sup>81</sup>, washed and incubated with streptavidin conjugated antibody along with secondaries (ThermoFisher Scientific and Jackson ImmunoResearch) appropriate to other antigens of interest for 3 hrs at room temp or overnight at 4 °C. Tissue was then mounted onto glass slides and cover slipped with Prolong Gold Antifade mounting medium (ThermoFisher Scientific). Imaging for quantification of *c-fos* and myc expression were conducted at 10x on a Zeiss Axio Imager.M2 connected to an OrcaFlash 4.0 C11440 camera. High quality images depicting myc and fos colocalization with GFP were taken on a Zeiss Airyscan 880 microscope. Imaging of whole brain sections was conducted at 10x on an Olympus VS-120 Virtual Slide Scanning Microscope.

Quantification of c-fos and GFP positive neurons was conducted in FIJI<sup>83</sup> using manual cell counting. c-fos puncta were excluded if they did not colocalize with DAPI. Myc+ GFP+ neurons were also quantified using manual cell counting in FIJI. Only GFP+ cell bodies that were completely filled with myc immunolabeling were considered to be myc+. The experimenter was blinded as to the experimental condition during quantification.

### *In vitro* electrophysiology

A stable line of HEK cells expressing Nav1.3 and Kir2.1 (Ex-HEK<sup>38</sup>, ATCC CRL-3269) were cultured on 18mm round coverslips, at a seeding density of ~300k cells/well in a tissue-culture treated 12-well plate. Cells were transiently transfected with a custom plasmid (Genscript) expressing hsTRPA1 and dTom fluorescent reporter as for screening experiments, 18-24 h post seeding. Cells underwent a media change, were allowed to recover, and then were used for recordings 18-24 h after transfection. Coverslips were transferred to a custom machined acrylic

stage containing a bath of external solution; NaCl (140 mM), KCl (4 mM), MgCl<sub>2</sub> (2 mM), Glucose (5 mM) and HEPES (10 mM) with an osmolarity of ~290 mOsm. Patch pipettes were pulled on a Sutter puller model P-97 programmed to give 4-6 MΩ tips from filamented borosilicate glass (o.d. 1.5 mm, i.d. 0.86 mm). Internal solution was CsF or KF based and obtained from Nanji[on (#08 3008, #08 3007). An Olympus 40x water dipping lens with 0.8 NA was used in combination with a (QImaging OptiMOS) cMOS camera used to visualize cells with Köhler or fluorescent illumination. dTom signal was used to confirm *hsTRPA1* expression in HEK cells. Electrical signals were acquired using Axon Instruments Multiclamp 700B amplifier and digitized with Digidata using pClamp acquisition and control software. Gap free recordings were conducted (typically holding the membrane potential at -70 mV) while delivering 100 ms pulses of ultrasound. The ultrasound delivery rig used for patch clamp experiments was the same used for imaging experiments. Briefly, waveforms were programmed using an arbitrary function generator (Keysight Technologies) connected via BNC to an amplifier (VTC2057574, Vox Technologies). Military communications grade BNC cables (Federal Custom Cable) were used to ensure impedance matching in our systems and reduce electrical interference. The amplifier was connected to our custom-made lithium niobate transducer mounted on a dove-tail sliding arm, and coupled to the bottom of the recording chamber with ultrasound gel. The center of the transducer was left uncoated with gold in order to permit bright-field light to reach the sample, allowing us to align optics and obtain even illumination for DIC imaging. Recordings were carried out in response to peak negative pressures ranging from 0.2-0.25 MPa, as access resistance could not be maintained when high pressures were delivered. Cell attached Ex-HEK-GCaMP cells-maintained membrane resistances between 0.5 and 3 GΩ. Patch-clamp experiments conducted on primary dissociated cortical neurons followed a modified protocol. Neurons were allowed to mature for 11-14 days *in vitro* prior to recording. Compared to HEK cells, neuron somatic morphology was better suited for whole-cell recording configuration. Both voltage-clamp (VC) and current clamp (CC) recordings were conducted. Upon successful whole-cell access, baseline gap-free recordings in CC or VC trials were obtained. Ultrasound stimulation parameters followed the same protocol as for the HEK cell recordings. For primary cortical neuron experiments, access resistance during successful whole-cell recordings was maintained between 10 to 25MΩ.

### In vitro pharmacology

For inhibition of TRPA1, we incubated cells with the antagonist HC030031<sup>21</sup> (40 $\mu$ M in DMSO; Cayman Chemicals #11923) for 45 min before stimulation. For activation of TRPA1, we used NMM<sup>21</sup> (N-Methylmaleimide; 100 $\mu$ M in DMSO Sigma-Aldrich #389412) or AITC<sup>36</sup> (30 $\mu$ M in DMSO, allyl isothiocyanate; Sigma-Aldrich # 377430). For activation of Piezo1, we used yoda-1<sup>72</sup> (10 $\mu$ M in DMSO; Tocris #5586). For activation of TRPV1 we used capsaicin<sup>73</sup> (3 $\mu$ M in DMSO; Sigma-Aldrich #M2028). The final concentration of DMSO in the external solution was 0.1% or lower for all groups; which was also used as vehicle control. For cytoskeleton experiments, nocodazole (5 $\mu$ M; Tocris, #1228), jasplakinolide (200 $\mu$ M; ThermoFisher # J7473), paclitaxel (600nM; Sigma-Aldrich # T7191), cytochalasin D (5 $\mu$ M; Cayman Chemicals, #11330) or latrunculin A (1 $\mu$ M; Cayman Chemicals, # 10630) in 0.1% DMSO were added to the culture media 45 minutes prior to imaging<sup>45</sup>. For pharmacology in primary neurons, we used TRPV1 antagonist, A784168<sup>74</sup> (20 $\mu$ M; Tocris, #4319, 45 min incubation) in 0.1% DMSO, BAPTA<sup>75</sup> (30 $\mu$ M; Invitrogen, #B1204, 45 min incubation) directly dissolved in culture media and TTX<sup>76</sup> (18 $\mu$ M; tetrodotoxin citrate; Tocris #1069, 5 minute incubation, where we also inhibit TTX-R channels).

### Mouse primary embryonic neuron culture

For WT primary neuron culture, timed pregnant C57Bl/6 female mice were ordered for E18 cortical dissociation (Charles River: 027). For TRPA1 knockout neuron culture, female TRPA1<sup>-/-</sup> (JAX #006401) dams were injected with luteinizing hormone releasing hormone (Sigma-Aldrich, L8008) 5 days before being paired with <sup>-/-</sup> males overnight. Pregnant dams were sacrificed and the E18 embryos were collected for cortical dissociation.

Mouse primary neuronal cultures were prepared from cortices isolated from embryonic day 18 (E18) mice, following the protocol described in<sup>68</sup>. Neurons were plated in 12-well culture plates with 18 mm PDL-coated coverslips (Neuvitro Corporation GG-18-PDL) at a concentration of 600-900k cells/well. Neurons were then incubated at 37°C, 5% CO<sub>2</sub>, with half media changes every 2-3 days with Neurobasal (ThermoFisher #21103049 supplemented with Primocin (InvivoGen #ant-pm-1), B-27 (ThermoFisher #17504044) and GlutaMAX (ThermoFisher #35050061). For calcium imaging experiments, cells were infected with AAV9-hSyn-GCaMP6f

(Addgene #100837-AAV9) at day in vitro 3 (DIV3) and half media change was performed the next day.

Neurons infected with GCaMP6f as stated above were infected with AAV9-hSyn-Cre (Addgene #105553-AAV9) and AAV9-hSyn-TRPA1-myc-DIO (Salk GT3 core) at DIV4 and half media changed was performed the next day. Cultures were incubated at 37°C, 5% CO<sub>2</sub> until DIV10-12 and then imaged using the same equipment as for HEK cell experiments.

### Phylogenetic analysis

A multiple sequence alignment of all ten TRPA1 sequences was generated using Geneious Prime MAFFT (version 7.450)<sup>77</sup>, with a BLOSUM 62 scoring matrix, gap open penalty of 1.53, and offset value of 0.123. A phylogenetic gene tree based on the MAFFT alignment was generating using Geneious Prime RAxML (version 8.2.11)<sup>78</sup>, with a GAMMA BLOSUM 62 protein model, bootstrapping using rapid hill-climbing with seed 1, starting with a complete random tree, and using the maximum likelihood search convergence criterion. The maximum likelihood tree was assessed and annotated in FigTree (version 1.4.4).

### Rat primary neuron culture

Rat primary neuronal cultures were prepared from rat pup tissue at embryonic days (E) 18 containing combined cortex, hippocampus and ventricular zone. The tissue was obtained from BrainBits (Catalogue #: SDEHCV) in Hibernate-E media and used the same day for dissociation following their protocol. Briefly, tissue was incubated in a solution of Papain (BrainBits PAP) at 2 mg/mL for 30 min at 37°C and dissociated in Hibernate-E for one minute using one sterile 9'' silanized Pasteur pipette with a fire polished tip. The cell dispersion solution was centrifuged at 1100 rpm for 1 min, and the pellet was resuspended with 1 mL NbActiv1 (BrainBits NbActiv1 500mL). Cell concentration was determined using a hemocytometer and neurons were plated in 12-well culture plates with 18-mm PDL-coated coverslips (Neuvitro Corporation GG-18-PDL) at a concentration of 1.3 million cells/well. Neurons were then incubated at 37°C, 5% CO<sub>2</sub>, performing half media changes every 3-4 days with fresh NbActiv1 supplemented with Primocin<sup>TM</sup> (InvivoGen ant-pm-1). Neurons infected with GCaMP6f as stated above were infected with AAV9-hSyn-Cre (Addgene #105553-AAV9) and AAV9-hSyn-TRPA1-myc-DIO

(Salk GT3 core) at DIV4 and half media changes were performed the next day. Cultures were incubated at 37°C, 5% CO<sub>2</sub> until DIV10-12 and were used in electrophysiology experiments.

### Rotarod

Mouse locomotor behaviour was evaluated on a Rotor-Rod (SD Instruments). Mice underwent a single day of training at a constant speed of 3 RPM to acclimate to the Rotor-Rod. The next day, mice were placed on a rod that started at 0 RPM and gradually increased to 30 RPM over a 5-minute period. The latency to fall off the rod was collected. Each mouse underwent 4 trials daily with a 20-minute inter-trial interval in which mice were returned to their cages. The latency to fall off was averaged across the three best trials. This procedure was repeated across 5 days. The experimenter was blinded as to the identity of groups.

### Sequences and annotations

Ten TRPA1 peptide sequences were retrieved from the National Center for Biotechnology Information (NCBI) RefSeq database for human (*Homo sapiens*; NCBI Taxonomy 9606; RefSeq XP\_016869435.1), mouse (*Mus musculus*; NCBI Taxonomy 10090; RefSeq NM\_177781), beaver (*Castor canadensis* ; NCBI Taxonomy 51338; RefSeq XP\_020010675.1), alpaca (*Vicugna pacos*; NCBI Taxonomy 30538; RefSeq XP\_006202494.1), donkey (*Equus asinus*; NCBI Taxonomy 9793; RefSeq XP\_014709261.1), bat (*Eptesicus fuscus*; NCBI Taxonomy 29078; RefSeq XP\_008148609.1), alligator (*Alligator mississippiensis*; NCBI Taxonomy 8496; RefSeq XP\_006277080.1), snake (*Notechis scutatus*; NCBI Taxonomy 8663; RefSeq XP\_026545023.1), molly (*Poecilia formosa*; NCBI Taxonomy 48698; RefSeq XP\_007554661.1), and zebrafish (*Danio rerio*; NCBI Taxonomy 7955; RefSeq NP\_001007066.1). The human TRPA1 sequence was also retrieved from the UniProtKB database and aligned to the human TRPA1 RefSeq sequence to confirm that the sequences were identical. Uniprot coordinates of major domains and features for human TRPA1 were used to annotate the sequence in Geneious Prime (version 2020.1.2).

### Ultrasound pressure and temperature measurements

Ultrasound pressure and temperature measurements were collected through ultrasound gel at the same position from the face of the lithium niobate transducer and within the brain tissue through

the skull using a Precision Acoustics Fiber-Optic Hydrophone connected to a Tektronix TBS 1052B Oscilloscope and ThinkPad Ultrabook. To enable stereotaxic insertion into the brain, the Fiber-Optic Hydrophone probe was carefully threaded through a glass capillary allowing the tip to remain exposed. Cortical measurements were taken in *ex vivo* cranial tissue in which the jaw and palate were removed to expose the base of the brain. Using the center of the hypothalamus as coordinates 0,0,0, the hydrophone was inserted at AP +1.2, ML 1.0 and lowered to a depth of -5.6 to approximate the location of the layer V motor cortex. The transducer was coupled to the skull via ultrasound gel and temperature and pressure measurements were collected.

### Ultrasound transducer

We used a set of custom-made single crystalline 127.68 Y-rotated X-propagating lithium niobate transducers operating in the thickness mode, as described in<sup>33</sup>. The fundamental frequency was measured to be 6.91 MHz using non-contact laser Doppler vibrometry (Polytec, Waldbronn, Germany). The devices were diced to 12 mm x 12 mm and built in to the *in vitro* test setup. The transducers were coated with a conductive layer of Au with a thickness of 1  $\mu$ m with 20 nm of Ti acting as an adhesion layer. A DC sputtering (Denton 635 DC Sputtering system) process was used to coat 4" wafers in an inert gas environment with a 2.3 mTorr pressure and rotation speed of 13 rpm, at a deposition rate of 1.5 A/s for Ti and 7A/s for Au. Devices were diced to size using an automated dicing saw (DISCO 3220) and the resonance frequency verified using non-contact laser Doppler vibrometry. Custom transducers were fabricated with resonant frequencies of 1 MHz and 1.978 MHz to test ultrasound responsiveness of various channels at those stimuli (Boston Piezo-Optics, MA).

### Viruses

pAAV.Syn.DIO.*hs*TRPA1-myc plasmid was custom made by GenScript. synP.DIO.EGFP.WPRE.hGH was a gift from Ian Wickersham (Addgene viral prep # 100043-AAV9). pAAV.Syn.GCaMP6f.WPRE.SV40<sup>34</sup> was a gift from Douglas Kim & GENIE Project (Addgene viral prep # 100837-AAV9 ; <http://n2t.net/addgene:100837> ; RRID:Addgene\_100837). pENN.AAV.hSyn.Cre.WPRE.hGH was a gift from James M. Wilson (Addgene viral prep # 105553-AAV9; <http://n2t.net/addgene:105553> ; RRID:Addgene\_105553). AAV9-hsyn-DIO-*hs*TRPA1-myc (GT3 Core at Salk Institute of Biological Studies) was injected at either 4E13

along with 1E12 AAV9-hsyn-DIO-GFP (Addgene #100043-AAV9) diluted in Hank's Balance Salt Solution for injection. Adult male and female Npr3-cre mice (19-30g) received 400nL unilateral injections to the right motor cortex at AP 0.0 ML -1.0, AP +0.5 ML -1.0, AP +0.5 ML-1.5 at DV 0.5<sup>54</sup>. Briefly, small holes were drilled (0.45 mm drill bit) into the skull over those coordinates, and virus was delivered through a pulled glass pipette at 2nL/sec by a Nanoject iii (Drummond Scientific Company). Successful viral delivery was confirmed post-mortem via immunohistochemistry for GFP and/or the myc-tag.

## QUANTIFICATION AND STATISTICAL ANALYSIS

Statistical analyses were performed in GraphPad Prism and R. All statistical tests in this study were two-tailed. Single-variable comparisons were made with Mann-Whitney test. Group comparisons were made using either analysis of variance (ANOVA) followed by Tukey–Kramer post-hoc analysis or non-parametric Kruskal-Wallis test followed by Dunn's post-hoc analysis. The ROUT method in GraphPad Prism with a  $q = 0.2\%$  was used to identify and exclude outliers. Statistics used to analyze calcium imaging data are described in Methods. No statistical methods were used to predetermine sample sizes for single experiments.

## DATA AND CODE AVAILABILITY

The code used to analyze calcium imaging data are available at <https://github.com/shreklab/Duque-Lee-Kubli-Tufail2020.git>. The datasets supporting the current study have not been deposited in a public repository but are available from the corresponding author on request.

The reagents generated in this study, including pAAV-hSyn-DIO-hTRPA1-myc will be deposited in Addgene and are available upon reasonable request. Further information and requests for resources and reagents should be directed to and will be fulfilled by the Lead Contact, Sreekanth H. Chalasani ([schalasani@salk.edu](mailto:schalasani@salk.edu)).

## REFERENCES

- 1 Legon, W. *et al.* Transcranial focused ultrasound modulates the activity of primary somatosensory cortex in humans. *Nat Neurosci* **17**, 322-329, doi:10.1038/nn.3620 (2014).



- 2 Legon, W., Bansal, P., Tyshynsky, R., Ai, L. & Mueller, J. K. Transcranial focused ultrasound neuromodulation of the human primary motor cortex. *Sci Rep* **8**, 10007, doi:10.1038/s41598-018-28320-1 (2018).
- 3 Kubanek, J. *et al.* Remote, brain region-specific control of choice behavior with ultrasonic waves. *Science Advances* **6**, eaaz4193, doi:10.1126/sciadv.aaz4193 (2020).
- 4 Deffieux, T. *et al.* Low-intensity focused ultrasound modulates monkey visuomotor behavior. *Curr Biol* **23**, 2430-2433, doi:10.1016/j.cub.2013.10.029 (2013).
- 5 Mehić, E. *et al.* Increased Anatomical Specificity of Neuromodulation via Modulated Focused Ultrasound. *PLOS ONE* **9**, e86939, doi:10.1371/journal.pone.0086939 (2014).
- 6 Kim, T. *et al.* Effect of Low Intensity Transcranial Ultrasound Stimulation on Neuromodulation in Animals and Humans: An Updated Systematic Review. *Frontiers in Neuroscience* **15**, doi:10.3389/fnins.2021.620863 (2021).
- 7 Wang, S. *et al.* Ultrasonic Neuromodulation and Sonogenetics: A New Era for Neural Modulation. *Frontiers in Physiology* **11**, doi:10.3389/fphys.2020.00787 (2020).
- 8 Yu, K., Niu, X., Krook-Magnuson, E. & He, B. Intrinsic functional neuron-type selectivity of transcranial focused ultrasound neuromodulation. *Nature communications* **12**, 2519, doi:10.1038/s41467-021-22743-7 (2021).
- 9 Hynynen, K. & Jolesz, F. A. Demonstration of potential noninvasive ultrasound brain therapy through an intact skull. *Ultrasound Med Biol* **24**, 275-283, doi:S0301-5629(97)00269-X [pii] (1998).
- 10 Clement, G. T. & Hynynen, K. A non-invasive method for focusing ultrasound through the human skull. *Phys Med Biol* **47**, 1219-1236 (2002).
- 11 King, R. L., Brown, J. R., Newsome, W. T. & Pauly, K. B. Effective parameters for ultrasound-induced in vivo neurostimulation. *Ultrasound Med Biol* **39**, 312-331, doi:10.1016/j.ultrasmedbio.2012.09.009 (2013).
- 12 Tufail, Y. *et al.* Transcranial pulsed ultrasound stimulates intact brain circuits. *Neuron* **66**, 681-694, doi:10.1016/j.neuron.2010.05.008 (2010).
- 13 Ye, P. P., Brown, J. R. & Pauly, K. B. Frequency Dependence of Ultrasound Neurostimulation in the Mouse Brain. *Ultrasound Med Biol* **42**, 1512-1530, doi:10.1016/j.ultrasmedbio.2016.02.012 (2016).
- 14 Folloni, D. *et al.* Manipulation of Subcortical and Deep Cortical Activity in the Primate Brain Using Transcranial Focused Ultrasound Stimulation. *Neuron* **101**, 1109-1116 e1105, doi:10.1016/j.neuron.2019.01.019 (2019).
- 15 Verhagen, L. *et al.* Offline impact of transcranial focused ultrasound on cortical activation in primates. *eLife* **8**, doi:10.7554/eLife.40541 (2019).
- 16 O'Brien, W. D., Jr. Ultrasound-biophysics mechanisms. *Prog Biophys Mol Biol* **93**, 212-255, doi:S0079-6107(06)00091-5 [pii] 10.1016/j.pbiomolbio.2006.07.010 (2007).
- 17 Lee, W. *et al.* Image-guided transcranial focused ultrasound stimulates human primary somatosensory cortex. *Sci Rep* **5**, 8743, doi:10.1038/srep08743 (2015).
- 18 Lee, W. *et al.* Transcranial focused ultrasound stimulation of human primary visual cortex. *Sci Rep* **6**, 34026, doi:10.1038/srep34026 (2016).
- 19 Naor, O., Krupa, S. & Shoham, S. Ultrasonic neuromodulation. *J Neural Eng* **13**, 031003, doi:10.1088/1741-2560/13/3/031003 (2016).
- 20 Tyler, W. J. Noninvasive neuromodulation with ultrasound? A continuum mechanics hypothesis. *Neuroscientist* **17**, 25-36, doi:1073858409348066 [pii]

10.1177/1073858409348066 (2011).

- 21 Oh, S. J. *et al.* Ultrasonic Neuromodulation via Astrocytic TRPA1. *Curr Biol* **29**, 3386-3401 e3388, doi:10.1016/j.cub.2019.08.021 (2019).
- 22 Sato, T., Shapiro, M. G. & Tsao, D. Y. Ultrasonic Neuromodulation Causes Widespread Cortical Activation via an Indirect Auditory Mechanism. *Neuron* **98**, 1031-1041 e1035, doi:10.1016/j.neuron.2018.05.009 (2018).
- 23 Guo, H. *et al.* Ultrasound Produces Extensive Brain Activation via a Cochlear Pathway. *Neuron* **98**, 1020-1030 e1024, doi:10.1016/j.neuron.2018.04.036 (2018).
- 24 Yoo, S., Mittelstein, D. R., Hurt, R. C., Lacroix, J. J. & Shapiro, M. G. Focused ultrasound excites neurons via mechanosensitive calcium accumulation and ion channel amplification. *bioRxiv* (2020).
- 25 Kubanek, J., Shukla, P., Das, A., Baccus, S. A. & Goodman, M. B. Ultrasound Elicits Behavioral Responses through Mechanical Effects on Neurons and Ion Channels in a Simple Nervous System. *J Neurosci* **38**, 3081-3091, doi:10.1523/JNEUROSCI.1458-17.2018 (2018).
- 26 Ibsen, S., Tong, A., Schutt, C., Esener, S. & Chalasani, S. H. Sonogenetics is a non-invasive approach to activating neurons in *Caenorhabditis elegans*. *Nature communications* **6**, 8264, doi:10.1038/ncomms9264 (2015).
- 27 Ye, J. *et al.* Ultrasonic Control of Neural Activity through Activation of the Mechanosensitive Channel MscL. *Nano Lett* **18**, 4148-4155, doi:10.1021/acs.nanolett.8b00935 (2018).
- 28 Qiu, Z. *et al.* The Mechanosensitive Ion Channel Piezo1 Significantly Mediates In Vitro Ultrasonic Stimulation of Neurons. *iScience* **21**, 448-457, doi:10.1016/j.isci.2019.10.037 (2019).
- 29 Huang, Y. S. *et al.* Sonogenetic Modulation of Cellular Activities Using an Engineered Auditory-Sensing Protein. *Nano Lett* **20**, 1089-1100, doi:10.1021/acs.nanolett.9b04373 (2020).
- 30 Kubanek, J. *et al.* Ultrasound modulates ion channel currents. *Sci Rep* **6**, 24170, doi:10.1038/srep24170 (2016).
- 31 Holland, C. K. & Apfel, R. E. An improved theory for the prediction of microcavitation thresholds. *IEEE transactions on ultrasonics, ferroelectrics, and frequency control* **36**, 204-208 (1989).
- 32 Medicine, A. I. o. U. i. Statement on mammalian biological effects in tissues with naturally occurring gas bodies. *American Institute of Ultrasound in Medicine website* (2015).
- 33 Collignon, S., Manor, O. & Friend, J. Improving and Predicting Fluid Atomization via Hysteresis-Free Thickness Vibration of Lithium Niobate. *Advanced Functional Materials* **28**, 1704359 (2018).
- 34 Chen, T. W. *et al.* Ultrasensitive fluorescent proteins for imaging neuronal activity. *Nature* **499**, 295-300, doi:10.1038/nature12354 (2013).
- 35 Choy, E. *et al.* Endomembrane trafficking of ras: the CAAX motif targets proteins to the ER and Golgi. *Cell* **98**, 69-80, doi:10.1016/S0092-8674(00)80607-8 (1999).
- 36 Raisinghani, M. *et al.* Activation characteristics of transient receptor potential ankyrin 1 and its role in nociception. *Am J Physiol Cell Physiol* **301**, C587-600, doi:10.1152/ajpcell.00465.2010 (2011).

- 37 Eid, S. R. *et al.* HC-030031, a TRPA1 selective antagonist, attenuates inflammatory- and neuropathy-induced mechanical hypersensitivity. *Mol Pain* **4**, 48, doi:10.1186/1744-8069-4-48 (2008).
- 38 Park, J. *et al.* Screening fluorescent voltage indicators with spontaneously spiking HEK cells. *PLoS One* **8**, e85221, doi:10.1371/journal.pone.0085221 (2013).
- 39 Wang, Y. Y., Chang, R. B., Waters, H. N., McKemy, D. D. & Liman, E. R. The nociceptor ion channel TRPA1 is potentiated and inactivated by permeating calcium ions. *J Biol Chem* **283**, 32691-32703, doi:10.1074/jbc.M803568200 (2008).
- 40 Talavera, K. *et al.* Mammalian Transient Receptor Potential TRPA1 Channels: From Structure to Disease. *Physiol Rev* **100**, 725-803, doi:10.1152/physrev.00005.2019 (2020).
- 41 King, J. V. L. *et al.* A cell-penetrating scorpion toxin enables mode-specific modulation of TRPA1 and pain. *Cell* **178**, 1362-1374. e1316 (2019).
- 42 Zhao, J., King, J. V. L., Cheng, Y. & Julius, D. Mechanisms governing irritant-evoked activation and calcium modulation of TRPA1. *bioRxiv* (2019).
- 43 Corey, D. P. *et al.* TRPA1 is a candidate for the mechanosensitive transduction channel of vertebrate hair cells. *Nature* **432**, 723-730, doi:10.1038/nature03066 (2004).
- 44 Sotomayor, M., Corey, D. P. & Schulten, K. In search of the hair-cell gating spring elastic properties of ankyrin and cadherin repeats. *Structure* **13**, 669-682, doi:10.1016/j.str.2005.03.001 (2005).
- 45 Zhang, W. *et al.* Ankyrin Repeats Convey Force to Gate the NOMPC Mechanotransduction Channel. *Cell* **162**, 1391-1403, doi:10.1016/j.cell.2015.08.024 (2015).
- 46 Startek, J. B. *et al.* Mouse TRPA1 function and membrane localization are modulated by direct interactions with cholesterol. *eLife* **8**, doi:10.7554/eLife.46084 (2019).
- 47 Zidovetzki, R. & Levitan, I. Use of cyclodextrins to manipulate plasma membrane cholesterol content: evidence, misconceptions and control strategies. *Biochim Biophys Acta* **1768**, 1311-1324, doi:10.1016/j.bbamem.2007.03.026 (2007).
- 48 Hjerling-Leffler, J., Alqatari, M., Ernfors, P. & Koltzenburg, M. Emergence of functional sensory subtypes as defined by transient receptor potential channel expression. *J Neurosci* **27**, 2435-2443, doi:10.1523/JNEUROSCI.5614-06.2007 (2007).
- 49 Gouin, O. *et al.* TRPV1 and TRPA1 in cutaneous neurogenic and chronic inflammation: pro-inflammatory response induced by their activation and their sensitization. *Protein Cell* **8**, 644-661, doi:10.1007/s13238-017-0395-5 (2017).
- 50 Daigle, T. L. *et al.* A Suite of Transgenic Driver and Reporter Mouse Lines with Enhanced Brain-Cell-Type Targeting and Functionality. *Cell* **174**, 465-480 e422, doi:10.1016/j.cell.2018.06.035 (2018).
- 51 Sunkin, S. M. *et al.* Allen Brain Atlas: an integrated spatio-temporal portal for exploring the central nervous system. *Nucleic Acids Research* **41**, D996-D1008, doi:10.1093/nar/gks1042 (2012).
- 52 Wu, C. *et al.* BioGPS: an extensible and customizable portal for querying and organizing gene annotation resources. *Genome Biol* **10**, R130, doi:10.1186/gb-2009-10-11-r130 (2009).
- 53 Zhang, Y. *et al.* An RNA-sequencing transcriptome and splicing database of glia, neurons, and vascular cells of the cerebral cortex. *J Neurosci* **34**, 11929-11947, doi:10.1523/JNEUROSCI.1860-14.2014 (2014).

- 54 Ueno, M. *et al.* Corticospinal Circuits from the Sensory and Motor Cortices Differentially Regulate Skilled Movements through Distinct Spinal Interneurons. *Cell reports* **23**, 1286-1300 e1287, doi:10.1016/j.celrep.2018.03.137 (2018).
- 55 Tennant, K. A. *et al.* The organization of the forelimb representation of the C57BL/6 mouse motor cortex as defined by intracortical microstimulation and cytoarchitecture. *Cereb Cortex* **21**, 865-876, doi:10.1093/cercor/bhq159 (2011).
- 56 FOWLKES, J. B. & HOLLAND, C. K. Section 7: Discussion of the mechanical index and other exposure parameters. *Journal of ultrasound in medicine* **19**, 143-148 (2000).
- 57 Boisvert, M. M., Erikson, G. A., Shokhirev, M. N. & Allen, N. J. The Aging Astrocyte Transcriptome from Multiple Regions of the Mouse Brain. *Cell reports* **22**, 269-285, doi:10.1016/j.celrep.2017.12.039 (2018).
- 58 Batiuk, M. Y. *et al.* Identification of region-specific astrocyte subtypes at single cell resolution. *Nature communications* **11**, 1220, doi:10.1038/s41467-019-14198-8 (2020).
- 59 Shigetomi, E., Tong, X., Kwan, K. Y., Corey, D. P. & Khakh, B. S. TRPA1 channels regulate astrocyte resting calcium and inhibitory synapse efficacy through GAT-3. *Nature Neuroscience* **15**, 70-80, doi:10.1038/nn.3000 (2012).
- 60 Qiu, Z. *et al.* Targeted Neurostimulation in Mouse Brains with Non-invasive Ultrasound. *Cell reports* **32**, 108033, doi:<https://doi.org/10.1016/j.celrep.2020.108033> (2020).
- 61 Kang, K. *et al.* Modulation of TRPA1 thermal sensitivity enables sensory discrimination in *Drosophila*. *Nature* **481**, 76-80, doi:10.1038/nature10715 (2011).
- 62 Hayakawa, K., Tatsumi, H. & Sokabe, M. Actin stress fibers transmit and focus force to activate mechanosensitive channels. *Journal of cell science* **121**, 496-503 (2008).
- 63 Le Roux, A.-L., Quiroga, X., Walani, N., Arroyo, M. & Roca-Cusachs, P. The plasma membrane as a mechanochemical transducer. *Philosophical Transactions of the Royal Society B* **374**, 20180221 (2019).
- 64 Startek, J. B. *et al.* The Agonist Action of Alkylphenols on TRPA1 Relates to Their Effects on Membrane Lipid Order: Implications for TRPA1-Mediated Chemosensation. *International Journal of Molecular Sciences* **22**, 3368 (2021).
- 65 Collins, M. N. & Mesce, K. A. Focused Ultrasound Neuromodulation and the Confounds of Intracellular Electrophysiological Investigation. *eneuro* **7**, ENEURO.0213-0220.2020, doi:10.1523/eneuro.0213-20.2020 (2020).
- 66 Kwan, K. Y. *et al.* TRPA1 contributes to cold, mechanical, and chemical nociception but is not essential for hair-cell transduction. *Neuron* **50**, 277-289, doi:10.1016/j.neuron.2006.03.042 (2006).
- 67 Patel, M., Giddings, A. M., Sechelski, J. & Olsen, J. C. High efficiency gene transfer to airways of mice using influenza hemagglutinin pseudotyped lentiviral vectors. *J Gene Med* **15**, 51-62, doi:10.1002/jgm.2695 (2013).
- 68 Hilgenberg, L. G. & Smith, M. A. Preparation of dissociated mouse cortical neuron cultures. *J Vis Exp*, 562, doi:10.3791/562 (2007).
- 69 Qiu, W., Bouakaz, A., Konofagou, E. E. & Zheng, H. Ultrasound for the brain: A review of physical and engineering principles, and clinical applications. *IEEE Transactions on Ultrasonics, Ferroelectrics, and Frequency Control* **68**, 6-20 (2020).
- 70 Arnadottir, J. & Chalfie, M. Eukaryotic mechanosensitive channels. *Annu Rev Biophys* **39**, 111-137, doi:10.1146/annurev.biophys.37.032807.125836 (2010).
- 71 Tyler, W. J. The mechanobiology of brain function. *Nat Rev Neurosci* **13**, 867-878, doi:10.1038/nrn3383 (2012).

- 72 Syeda, R. *et al.* Chemical activation of the mechanotransduction channel Piezo1. *eLife* **4**, doi:10.7554/eLife.07369 (2015).
- 73 Chu, Y., Cohen, B. E. & Chuang, H. H. A single TRPV1 amino acid controls species sensitivity to capsaicin. *Sci Rep* **10**, 8038, doi:10.1038/s41598-020-64584-2 (2020).
- 74 Cui, M. *et al.* TRPV1 receptors in the CNS play a key role in broad-spectrum analgesia of TRPV1 antagonists. *J Neurosci* **26**, 9385-9393, doi:10.1523/JNEUROSCI.1246-06.2006 (2006).
- 75 Hofer, A. M. Another dimension to calcium signaling: a look at extracellular calcium. *J Cell Sci* **118**, 855-862, doi:10.1242/jcs.01705 (2005).
- 76 Lee, C. H. & Ruben, P. C. Interaction between voltage-gated sodium channels and the neurotoxin, tetrodotoxin. *Channels (Austin)* **2**, 407-412, doi:10.4161/chan.2.6.7429 (2008).
- 77 Katoh, K. & Standley, D. M. MAFFT multiple sequence alignment software version 7: improvements in performance and usability. *Molecular biology and evolution* **30**, 772-780 (2013).
- 78 Stamatakis, A. RAxML version 8: a tool for phylogenetic analysis and post-analysis of large phylogenies. *Bioinformatics* **30**, 1312-1313 (2014).
- 79 Fantini, J. & Barrantes, F. J. How cholesterol interacts with membrane proteins: an exploration of cholesterol-binding sites including CRAC, CARC, and tilted domains. *Front Physiol* **4**, 31, doi:10.3389/fphys.2013.00031 (2013).
- 80 Rice, P., Longden, I. & Bleasby, A. EMBOSS: the European Molecular Biology Open Software Suite. *Trends Genet* **16**, 276-277, doi:10.1016/s0168-9525(00)02024-2 (2000).
- 81 McKay, J. A., Murray, G. I., Keith, W. N. & McLeod, H. L. Amplification of fluorescent in situ hybridisation signals in formalin fixed paraffin wax embedded sections of colon tumour using biotinylated tyramide. *Mol Pathol* **50**, 322-325, doi:10.1136/mp.50.6.322 (1997).
- 82 Madugula, V. & Lu, L. A ternary complex comprising transportin1, Rab8 and the ciliary targeting signal directs proteins to ciliary membranes. *J Cell Sci* **129**, 3922-3934, doi:10.1242/jcs.194019 (2016).
- 83 Schindelin, J. *et al.* Fiji: an open-source platform for biological-image analysis. *Nat Methods* **9**, 676-682, doi:10.1038/nmeth.2019 (2012).

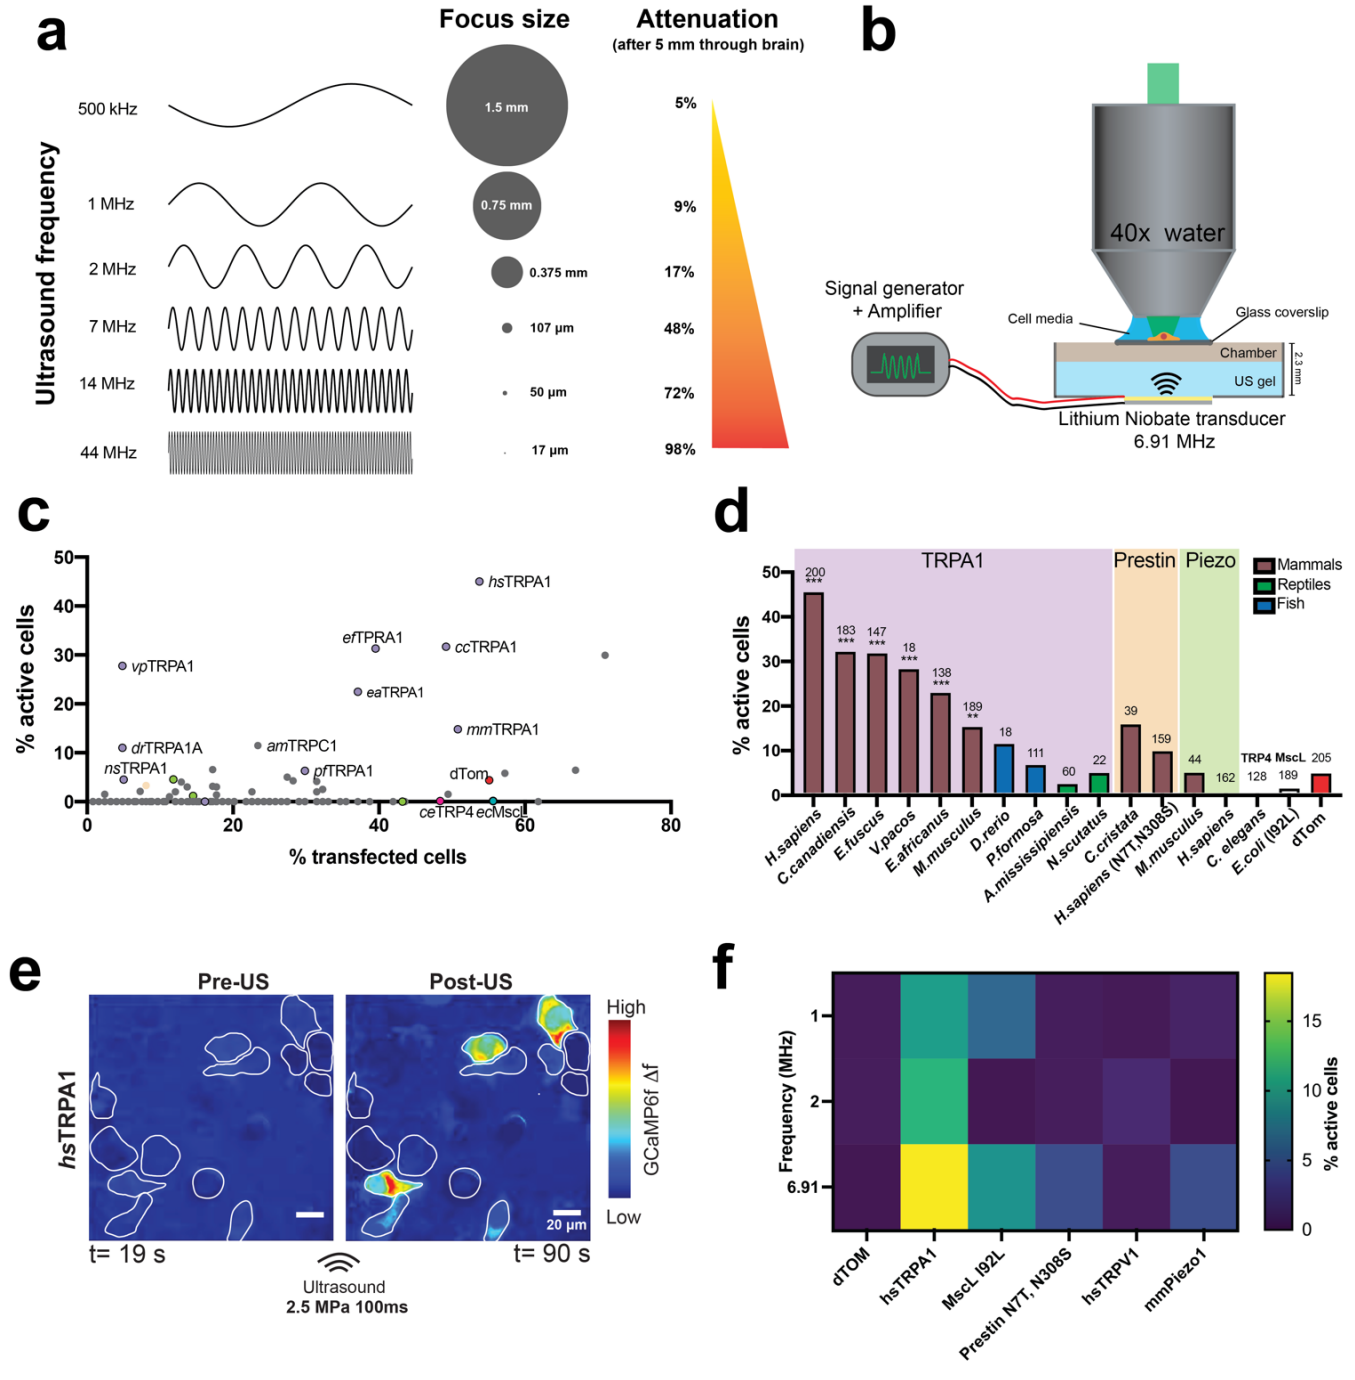

**Fig. 1. 2D screen identifies *hsTRPA1* as a candidate for sonogenetic stimulation at 6.91MHz.**

**a**, (Focal area and penetrance estimated for different ultrasound frequencies) **b**, Schematic showing the 6.91 MHz lithium niobate transducer delivering ultrasound stimuli to cells. Plot showing **c**, the percent of transfected cells vs percent of transfected cells that were activated after ultrasound stimulation for 191 cDNAs and **d**, the top responders and their homologs compared to previously published ultrasound-sensitive candidates. **e**, GCaMP6f signal in HEK cells expressing *hsTRPA1* before and after ultrasound stimulation. ROIs identify transfected cells (dTom+). Scale bar 20 $\mu$ m. **f**, Comparison of previously published ultrasound-sensitive candidates and *hsTRPA1* in terms of % active cells after ultrasound stimulation at different frequencies (1MHz, 2MHz and 6.91MHz). N = 3/coverslip per condition. Numbers of cells analyzed is indicated above each bar. **d**, \*\*p < 0.01, \*\*\*p<0.001, \*\*\*\*p<0.0001 by logistic regression.





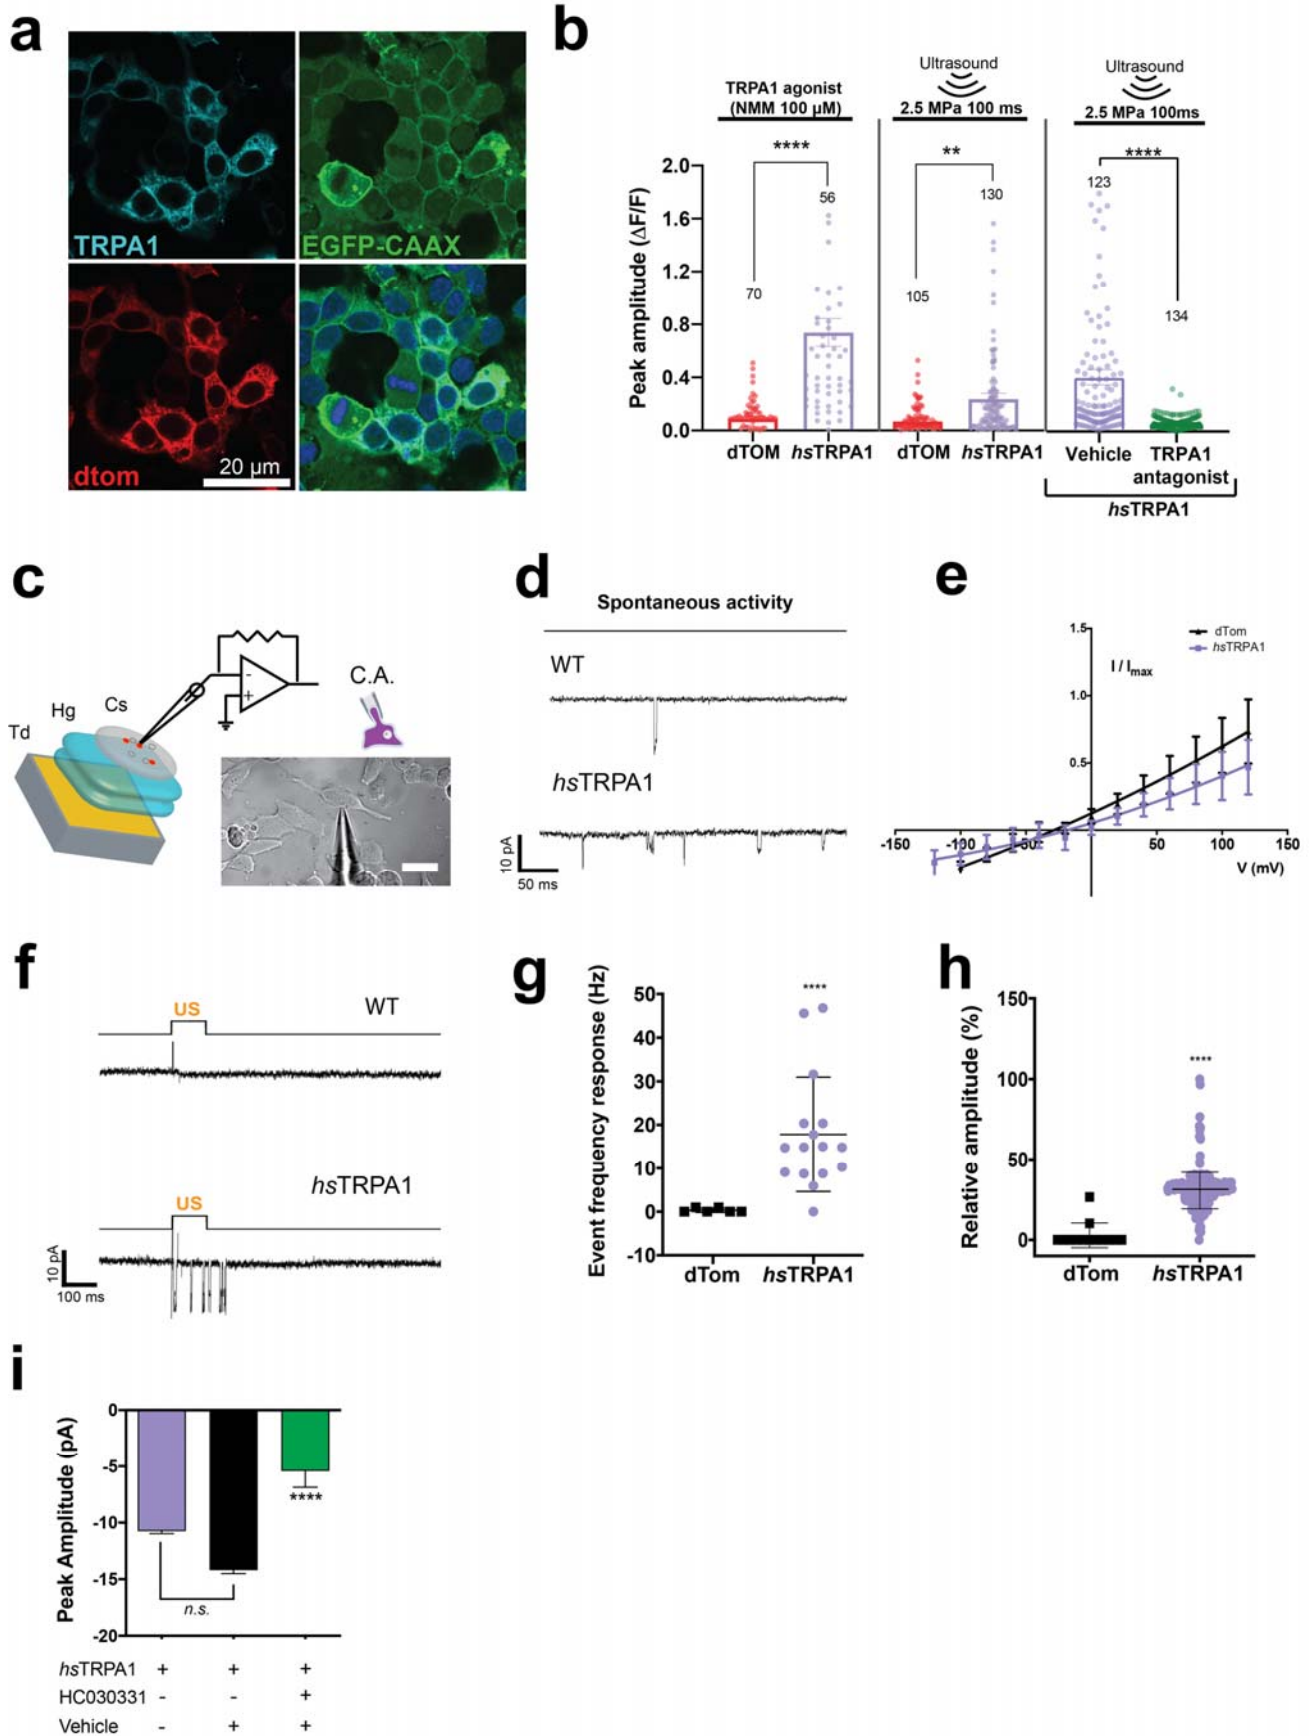

**Fig. 2. Functional characterization of hsTRPA1 ultrasound responses in HEK293T cells.**

**Fig. 2. Functional characterization of hsTRPA1 ultrasound responses in HEK cells** **a**, Representative image showing hsTRPA1 expression co-localized with membrane-targeted EGFP-CAAX in HEK cells. **b**, GCaMP6f peak amplitude in hsTRPA1- or dTom-expressing (control) HEK cells stimulated with TRPA1 agonist (NMM, 100  $\mu$ M), ultrasound alone or TRPA1 antagonist (HC-030031 40  $\mu$ M). **c**, Schematic showing the cell-attached configuration for electrophysiology with a DIC image of a representative HEK cell. **d**, Representative traces in HEK cells expressing dTom only (control) or *hsTRPA1* before ultrasound stimulation, showing increased spontaneous activity in *hsTRPA1*-expressing cells. **e**, I-V plot of HEK cells expressing dTom control or *hsTRPA1*. **f**, Representative gap-free voltage-clamp trace of dTom control- or *hsTRPA1*-expressing HEK to 100 ms, 0.15 MPa ultrasound stimuli. **g**, HEK cells expressing *hsTRPA1* have more frequent ultrasound-triggered membrane events compared to dTom controls. **h**, Summary of relative peak amplitude responses ( $I/I_{max}$ ) in HEK cells expressing dTom or *hsTRPA1*. **i**, Mean peak amplitude (pA) from HEK cells expressing *hsTRPA1* alone, and *hsTRPA1* treated with vehicle or TRPA1 antagonist (HC-030301 40  $\mu$ M). Events were sampled from N=8 cells/group. \*\*\*\* $p < 0.0001$  compared to control by unpaired, two-tailed t-test. Numbers of cells analyzed is indicated above each bar. **b**, **e**, \*\* $p < 0.01$ , \*\*\*\* $p < 0.0001$  by Mann-Whitney test.

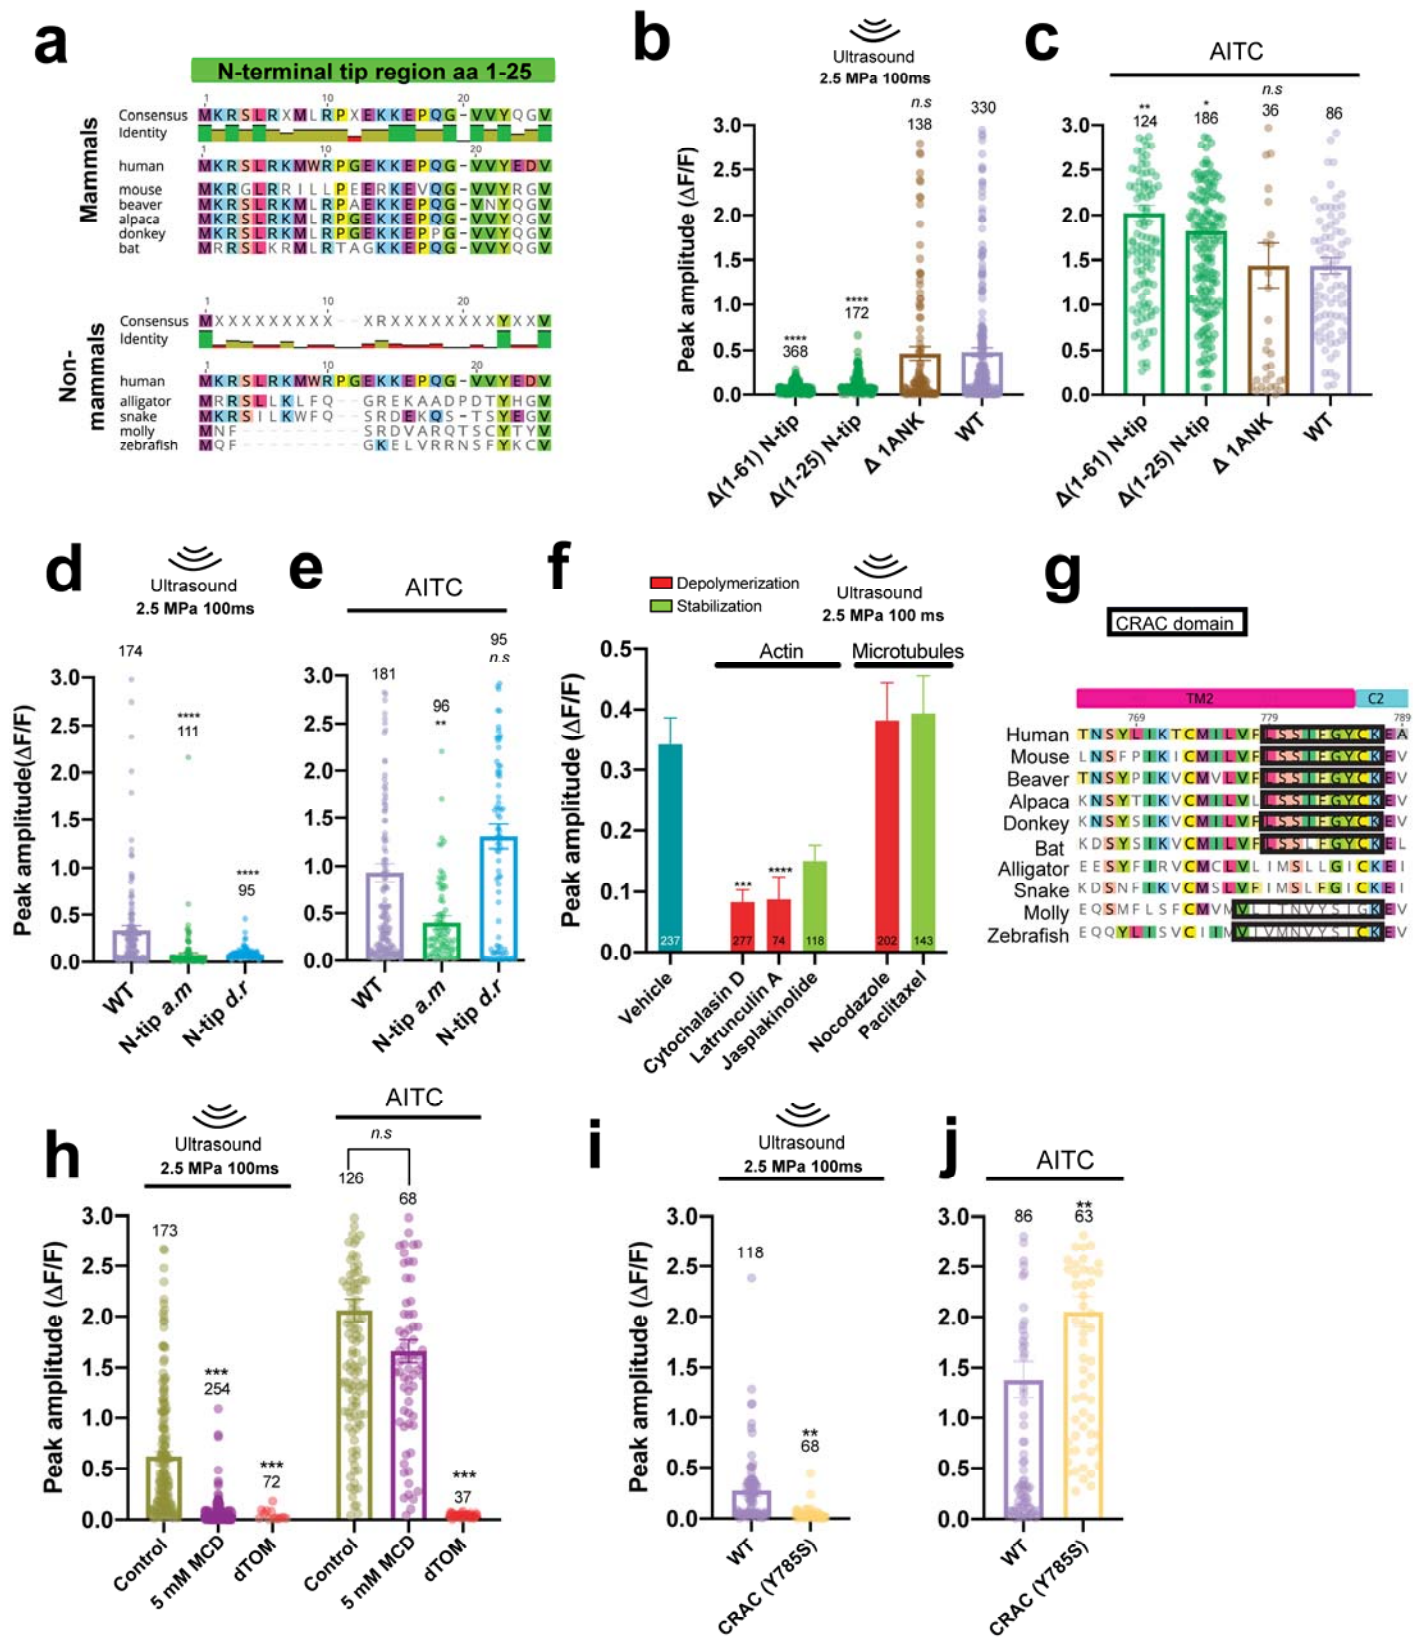

**Fig. 3. The N-terminal region of hsTRPA1, actin cytoskeleton and cholesterol contribute to ultrasound sensitivity.** **a**, Mammalian and non-mammalian alignments of the TRPA1 N-terminal tip region (aa1-25) from homologs tested for ultrasound sensitivity. GCaMP6f peak amplitude upon **b**, ultrasound stimulation or **c**, treatment with AITC (33  $\mu$ M) in HEK cells transfected with either full-length *hsTRPA1* or channels containing deletions of the whole N-terminal tip ( $\Delta(1-61)$ ), an initial subsection of the N-tip ( $\Delta(1-25)$ ) or only ankyrin repeat 1 ( $\Delta$ ANK1) without altering the pore or transmembrane regions. GCaMP6f peak amplitude upon **d**, ultrasound stimulation or **e**, treatment with AITC (33  $\mu$ M) in HEK cells transfected with either full-length *hsTRPA1* or chimeras in which the N-tip from alligator TRPA1 (N-tip a.m) or from zebrafish (N-tip d.r) was swapped in. **f**, GCaMP6f peak amplitude following ultrasound stimulation in cells expressing *hsTRPA1* after treatment with agents that either stabilize (green) or destabilize (red) microtubules and actin filaments compared to vehicle control. **g**, Transmembrane 2 domain sequence alignment across species tested for ultrasound sensitivity with Cholesterol Recognition/interaction Amino acid Consensus (CRAC) domain outlined. **h**, GCaMP6f peak amplitude in *hsTRPA1*-expressing HEK cells upon ultrasound stimulation or AITC treatment (33  $\mu$ M) after incubation with MCD (5 mM) or control. **i**, GCaMP6f peak amplitude in HEK cells expressing either WT *hsTRPA1* or a mutant with TM2 CRAC domain disrupted (Y785S) upon ultrasound stimulation or **j**, AITC treatment (33  $\mu$ M); Numbers on each bar indicate numbers of cell analyzed.  $p > 0.05$ ,  $**p < 0.01$ ,  $***p < 0.001$ ,  $****p < 0.0001$  by Kruskal-Wallis rank test and Dunn's test for multiple comparisons.



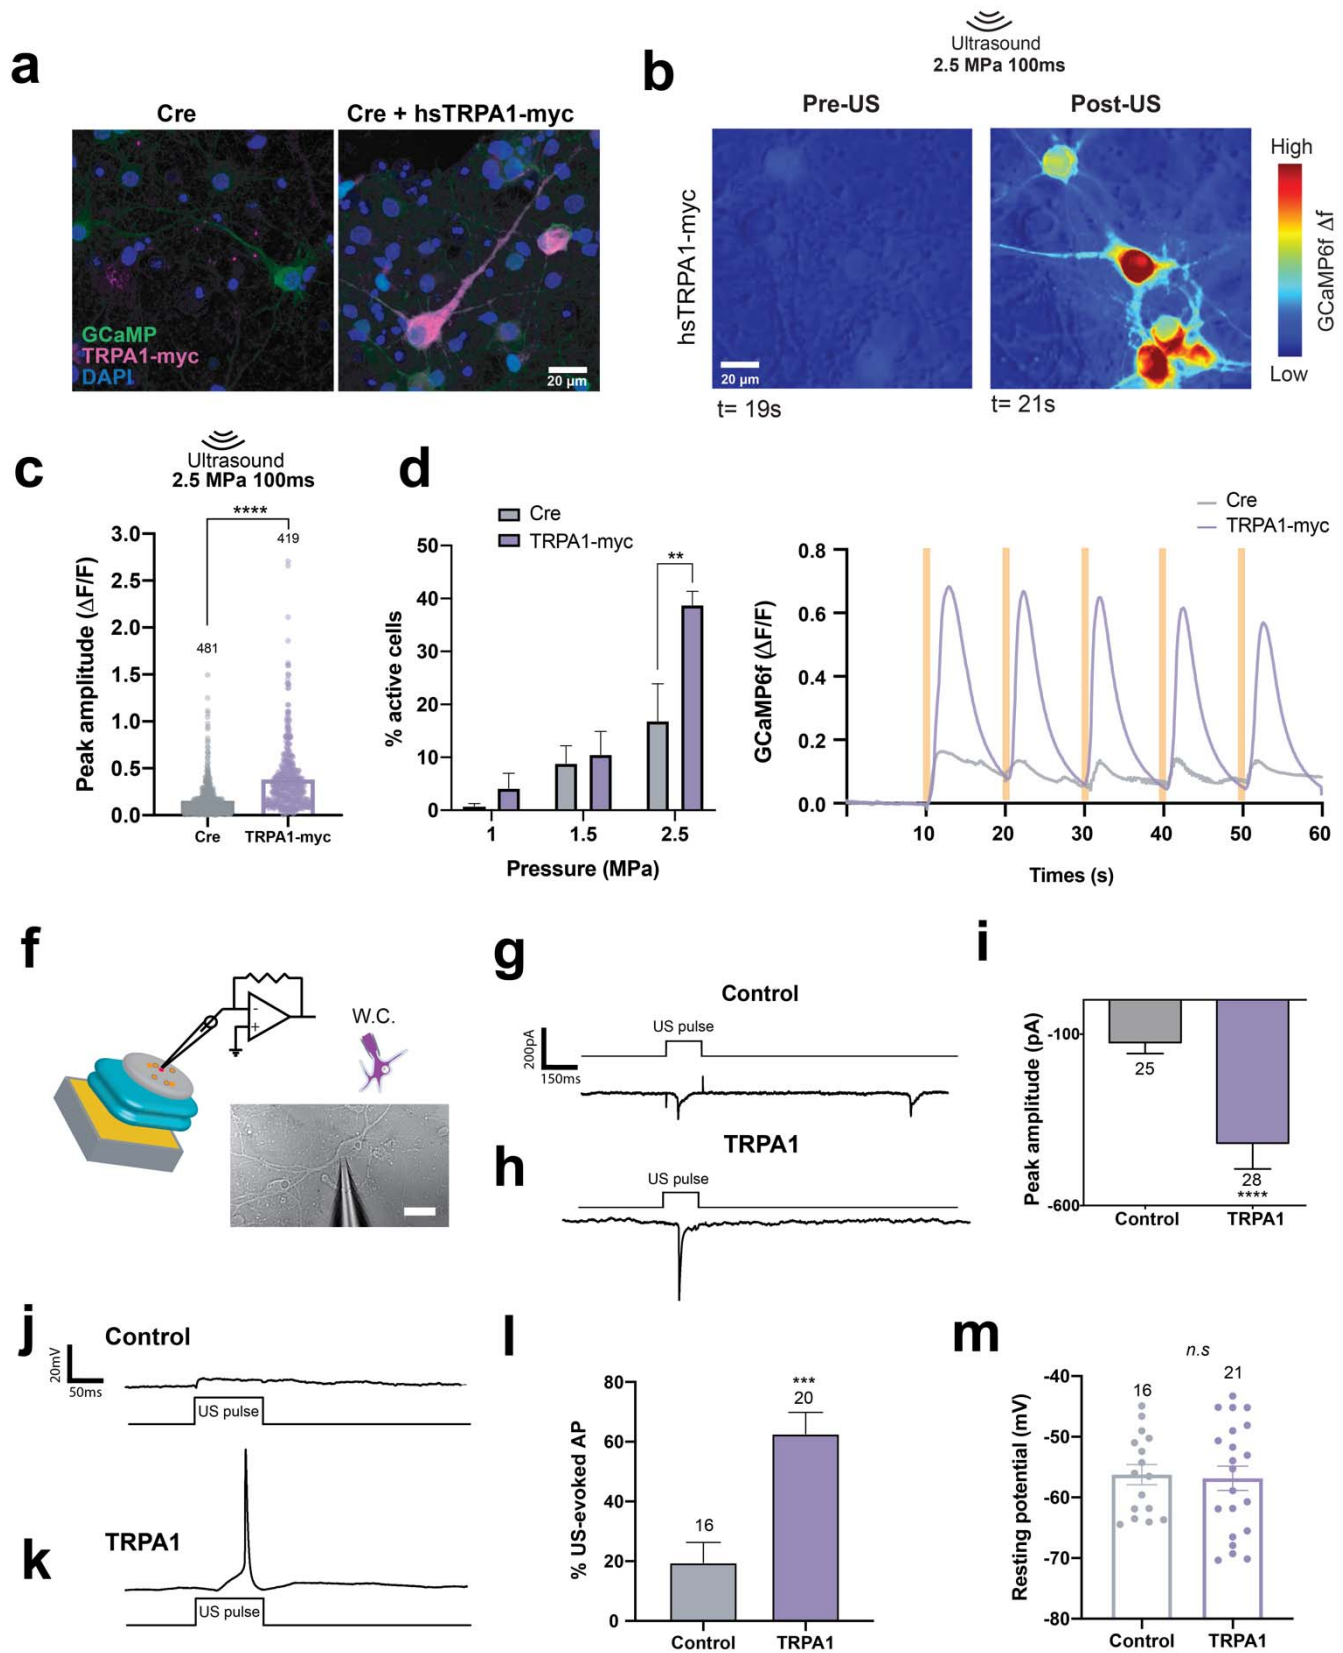

**Fig. 4. *hsTRPA1* potentiates calcium responses and evoked action potentials upon ultrasound stimulation in rodent primary neurons in vitro.** **a**, Representative images showing mouse primary neurons day *in vitro* (DIV) 12, expressing *hsTRPA1* or controls. **b**, GCaMP6f fluorescence in *hsTRPA1* expressing neurons before and after ultrasound stimulus. Plots showing peak amplitude of GCaMP6f fluorescence upon **c**, 2.5 MPa ultrasound stimuli of 100ms duration, and **d**, 100ms stimuli at different pressures. **e**, Average ratio of change in fluorescence to baseline fluorescence in neurons expressing *hsTRPA1* or control plasmids during repetitive 100 ms, 2.5 MPa ultrasound stimulation. The number of GCaMP6f-expressing neurons analyzed is indicated above each bar. **c**, \*\*\*\*  $p < 0.0001$ , by Mann-Whitney U test; **d**, \*  $p < 0.05$ , \*\*  $p < 0.01$ , \*\*\*\*  $p < 0.0001$  by two-way ANOVA with Geisser-Greenhouse correction. **f**, Schematic showing whole cell patch electrophysiology of neurons expressing *hsTRPA1* used for both voltage-clamp and current-clamp recordings. Representative gap-free voltage-clamp traces of **g**, control or **h**, neurons expressing *hsTRPA1* upon ultrasound stimuli in the 0.25MPa range. **i**, Plot showing peak amplitude response to ultrasound stimuli in neurons expressing *hsTRPA1* or controls (Cre). 6.91MHz 0.25MPa ultrasound in DIV 11-14 rat primary neurons under current-clamp mode elicits subthreshold voltage changes in controls (**j**) and action potentials (**k**) in *hsTRPA1* expressing cells. **l**, Percent of trials in which an action potential was elicited by ultrasound in controls and *hsTRPA1*-expressing neurons. **m**, Resting membrane potential is not altered in primary neurons upon expression of *hsTRPA1*. n.s.  $p > 0.05$ , \*\*\*  $p < 0.001$ , \*\*\*\*  $p < 0.0001$  by unpaired, two-tailed Mann-Whitney U test.

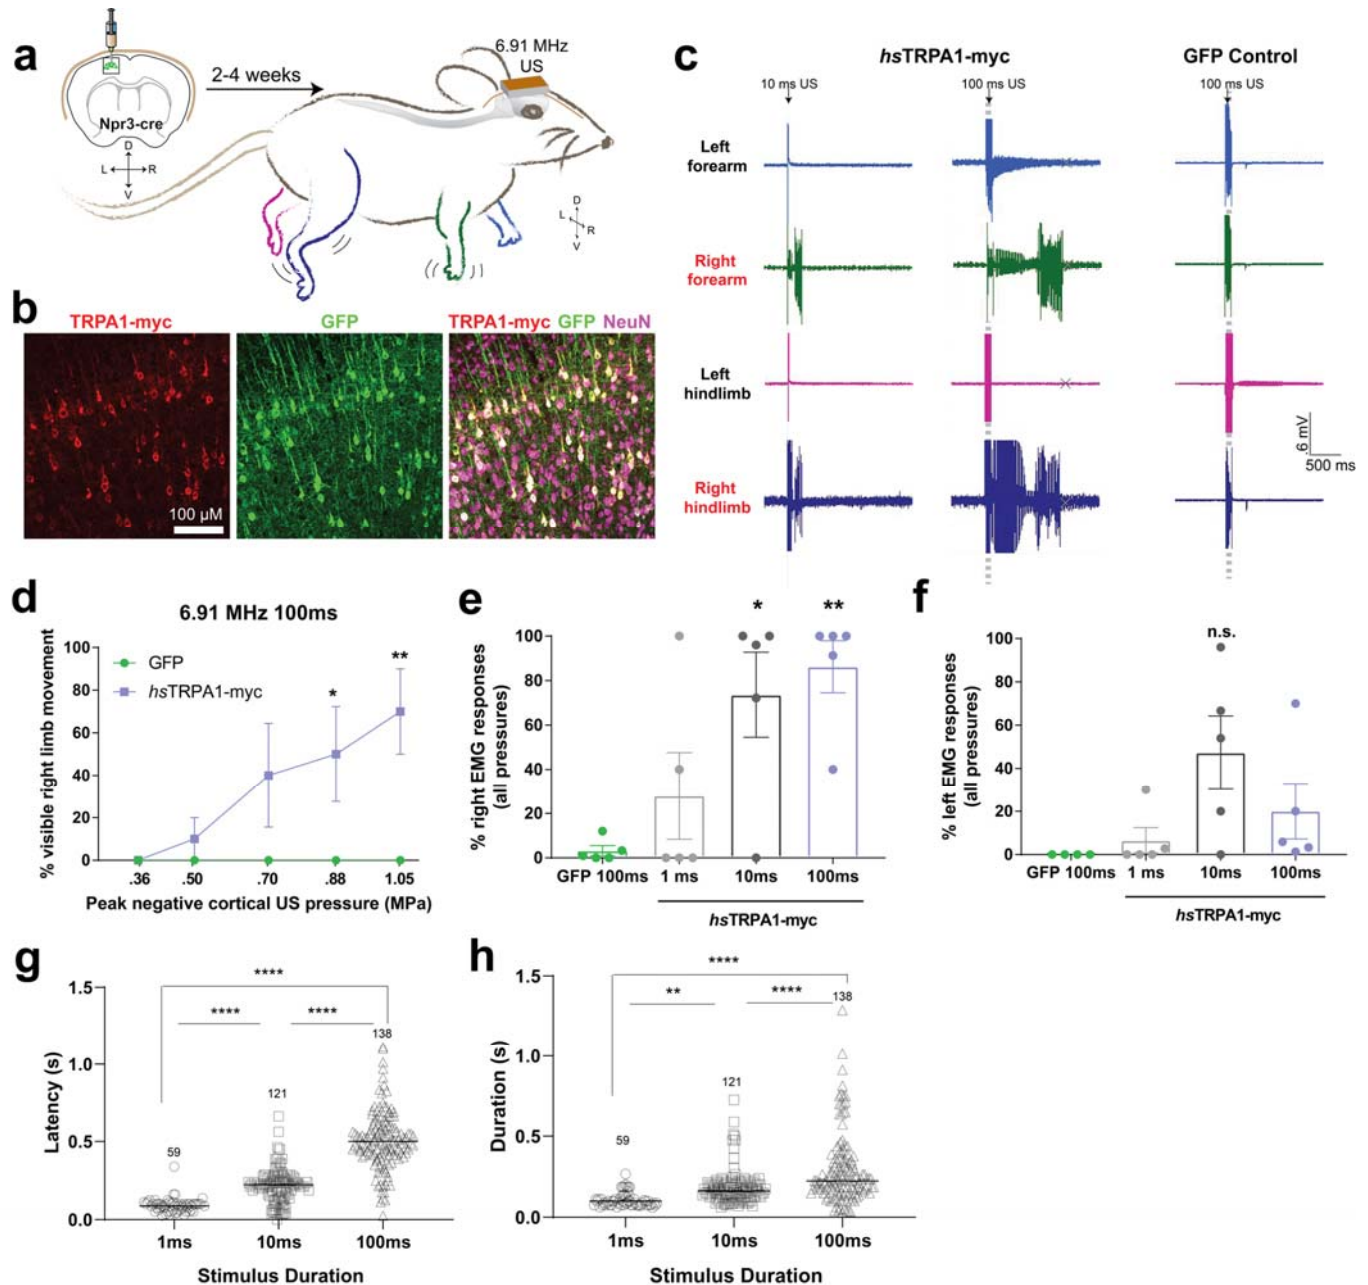

**Fig. 5. *hsTRPA1* enables sonogenetic activation of mouse layer V motor cortex neurons *in vivo*.** **a**, Schematic showing expression of *hsTRPA1* or GFP controls in the left motor cortex of Npr3-Cre transgenic mice innervating the right fore and hindlimbs allowing these to be controlled with ultrasound stimuli. **b**, Images showing expression of *hsTRPA1* and GFP (co-injection marker) in layer 5 cortical neurons *in vivo*. **c**, Representative EMG responses to 10 ms and 100 ms ultrasound stimuli from animals expressing *hsTRPA1* and controls. **d**, Visible right limb movements were scored in response to 100 ms ultrasound pulses of varying intensities. Plots showing percent of (e) right fore and hindlimb and (f) left fore and hindlimb EMG responses relative to number of stimulations pooled across all intensities. Plots showing (g) latency between the start of the ultrasound pulse and subsequent EMG response, and (h) duration from the start of the EMG response until the signal returned to baseline. **d - f**, n = 5/group, **g-h**, n = 39-138.



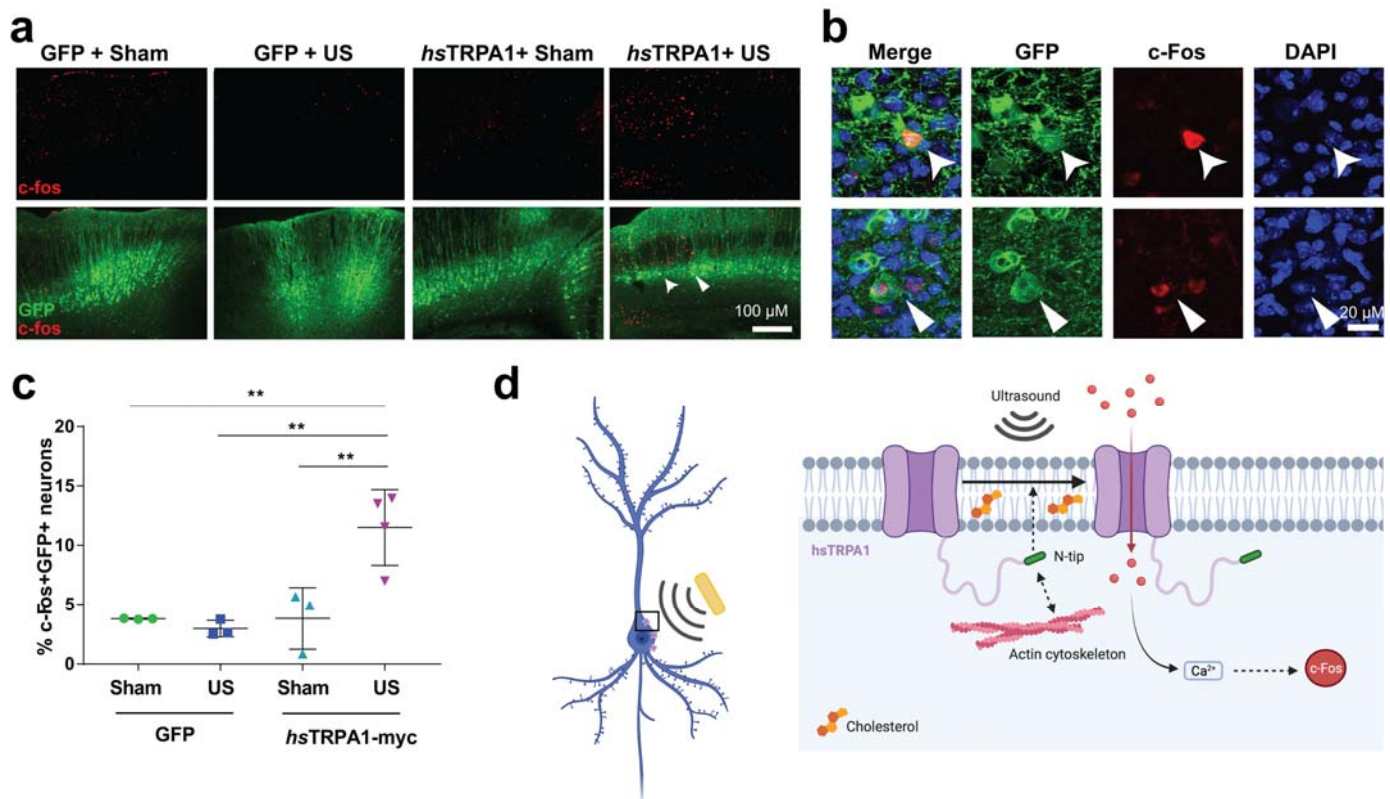

**Fig. 6. *hsTRPA1* enables ultrasound-triggered *c-fos* activation *in vivo*.** **a**, Representative images from sections taken at  $\sim 700 \mu\text{M}$  intervals throughout the GFP+ region of the cortex with *c-fos* staining. Zoomed images showing co-localization of **b**, *c-fos* and GFP and *c-fos* and DAPI within GFP positive neurons. **c**, Quantification of *c-Fos* positive, GFP+ neurons in different experimental groups, after ultrasound stimulation.  $n = 3-4/\text{group}$  \* $p < 0.05$ , \*\* $p < 0.01$ , \*\*\* $p < 0.0001$  compared to GFP control by two-way ANOVA followed Tukey's multiple comparisons. **d**, Proposed model of action of *hsTRPA1* in neurons, illustrating requirement of the N-terminal tip, actin cytoskeleton and cholesterol to induce an ultrasound-dependent increase in intracellular calcium resulting in neuronal activation and *c-fos* expression.
